# Supplementary material for: A six-month prospective, randomised, double-blinded, placebo-controlled, crossover, dietary trial design to investigate the potential of psychobiotics on seizure semiology and comorbidities in canine epilepsy: study protocol
Source: PubMed Central journal article supplement (PMC9983181; doi:10.1186/s12917-023-03609-0), 2023-03-03
Supplement: 12917_2023_3609_MOESM1_ESM.pdf [file 12917_2023_3609_MOESM1_ESM.pdf]

# BL999-Studie: Umfrage zum Hundeverhalten und zur Lebensqualität (C1)

Sehr geehrte Damen und Herren,

vielen Dank, dass Sie sich für die Studienteilnahme entschieden haben.

Mein Name ist Teresa Schmidt und ich arbeite als Doktorandinnen an der Klinik für Kleintiere der Stiftung Tierärztliche Hochschule Hannover unter der Leitung von Professor Dr. Volk in der Neurologie.

In dieser Studie wird sich mit dem Verhalten von Hunden, sowie der Entwicklung neuer Therapiemöglichkeiten beschäftigen. Dazu benötige ich Ihre Unterstützung, denn durch den täglichen Umgang mit Ihrem Tier können Sie das Verhalten am besten beurteilen.

Mit Ihrer Hilfe können neue Erkenntnisse in der Kleintiermedizin gewonnen werden, die zur Verbesserung und Entwicklung von neuen Therapiemethoden und der Vorbeugung von neurologischen Erkrankungen des Hundes beitragen.

Ich freue mich sehr, dass Sie sich die Zeit nehmen, diese Umfrage zu beantworten. Der Zeitaufwand beträgt ca. 30 Minuten. Ihre Antworten werden automatisch über das Programm LimeSurvey ausgewertet und die Ergebnisse werden händisch anhand der ermittelten Scores kategorisiert.

Sollten Sie Fragen bezüglich des Inhalts haben, können Sie mich gerne per E-Mail kontaktieren.

Vielen Dank,

Teresa Schmidt

E-Mail: [Teresa.Schmidt@tiho-hannover.de](mailto:Teresa.Schmidt@tiho-hannover.de) (<mailto:Teresa.Schmidt@tiho-hannover.de>)

**Mit dem Öffnen der Umfrage willigen Sie in die Verarbeitung Ihrer Daten entsprechend den Datenschutzhinweisen ein.**

In dieser Umfrage sind 59 Fragen enthalten.

## Allgemeine Angaben

In der Umfrage wird aus Gründen der besseren Lesbarkeit von dem Maskulinum "der Hund" gesprochen. Weibliche Hunde werden dabei selbstverständlich und ausdrücklich mit gemeint.

Bitte geben Sie Ihre Teilnehmernummer an. \*

❗ Bitte wählen Sie eine der folgenden Antworten:

Bitte wählen Sie nur eine der folgenden Antworten aus:

- 1
- 2
- 3
- 4
- 5
- 6
- 7
- 8
- 9
- 10
- 11
- 12
- 13
- 14
- 15
- 16
- 17
- 18
- 19
- 20
- 21
- 22
- 23
- 24
- 25
- 26
- 27

- 28
- 29
- 30
- 31
- 32
- 33
- 34
- 35
- 36
- 37
- 38
- 39
- 40
- 41
- 42
- 43
- 44
- 45
- 46
- 47
- 48
- 49
- 50
- 51
- 52
- 53
- 54
- 55
- 56
- 57
- 58

- 59
- 60
- 61
- 62
- 63
- 64
- 65
- 66
- 67
- 68
- 69
- 70
- 71
- 72
- 73
- 74
- 75
- 76
- 77
- 78
- 79
- 80
- 81
- 82
- 83
- 84
- 85
- 86
- 87
- 88
- 89

- 90
- 91
- 92
- 93
- 94
- 95
- 96
- 97
- 98
- 99
- 100

Ihre Teilnehmernummer wurde Ihnen zu Beginn der Studie von den Studienleitern mitgeteilt.

Wie lautet der Name Ihres Hundes? \*

Bitte geben Sie Ihre Antwort hier ein:

Bitte geben Sie das Alter Ihres Hundes an. \*

❗ Bitte wählen Sie eine der folgenden Antworten:

Bitte wählen Sie nur eine der folgenden Antworten aus:

<1

1

2

3

4

5

6

7

8

9

10

11

12

13

14

15

16

17

18

>18

Die Angabe des Alters erfolgt in Jahren.

Welches Geschlecht hat Ihr Hund? \*

❗ Bitte wählen Sie eine der folgenden Antworten:

Bitte wählen Sie nur eine der folgenden Antworten aus:

- Männlich unkastriert
- Weiblich unkastriert
- Männlich kastriert
- Weiblich kastriert

Zu welcher Rasse gehört Ihr Hund? \*

❗ Bitte wählen Sie eine der folgenden Antworten:

Bitte wählen Sie nur eine der folgenden Antworten aus:

- Australian Shepherd
- Beagle
- Belgischer Schäferhund
- Berner Sennenhund
- Bolonka Zwetna
- Border Collie
- Cane Corso
- Chihuahua
- Dackel
- Deutsche Dogge
- Deutscher Boxer
- Deutscher Schäferhund
- Deutscher Spitz
- Dobermann
- Englische Bulldogge
- Französische Bulldogge
- Golden Retriever
- Havaneser
- Jack Russell Terrier
- Labrador
- Magyar Vizsla
- Malteser
- Mischling
- Mops
- Old English Bulldog
- Pudel
- Rhodesian Ridgeback

- Rottweiler
- Shih Tzu
- Siberian Husky
- Yorkshire Terrier
- Sonstige Rassen

Sollte die Rasse Ihres Hundes nicht aufgeführt sein, wählen Sie bitte "Sonstige Rassen" aus.

Wenn sich Ihr Hund nicht eindeutig einer Rasse zuordnen lässt, wählen Sie bitte "Mischling" aus.

Wie schwer ist Ihr Hund? (in kg)

❗ In dieses Feld dürfen nur Zahlen eingegeben werden.

Bitte geben Sie Ihre Antwort hier ein:

kg

Beispiel: 5,3 kg

## Angaben zur Fütterung

Wie oft füttern Sie Ihren Hund?

❗ Bitte wählen Sie eine der folgenden Antworten:

Bitte wählen Sie nur eine der folgenden Antworten aus:

- Einmal täglich
- Zweimal täglich
- Dreimal täglich
- Ad libitum (Futter steht durchgehend zur freien Verfügung bereit)

Was füttern Sie Ihrem Hund? \*

❗ Bitte wählen Sie die zutreffenden Antworten aus:

Bitte wählen Sie alle zutreffenden Antworten aus:

- Nassfutter (Dose)
- Nassfutter (Beutel)
- Trockenfutter (Alleinfuttermittel)
- Trockenfutter (Mischung)
- Therapeutische / Verschriebene / Tierärztliche Diät
- Selbstgekochtes Futter
- Rohfutter (BARF)
- Vegetarisches Futter
- Belohnungen (Hundeleckerchen, z.B. Kekse, Denta-Sticks)
- Belohnungen (menschliche Nahrung, z.B. Speisereste)
- Sonstiges:

Wenn Sie ein anderes Futtermittel anbieten, dann ergänzen Sie es bitte unter "Sonstiges".

Wenn Sie eines der folgenden Futtermittel anbieten, beschreiben Sie bitte genau, worum es sich handelt. \*

❗ Kommentieren wenn eine Antwort gewählt wird

Bitte wählen Sie die zutreffenden Punkte aus und schreiben Sie einen Kommentar dazu:

Therapeutische / Verschriebene / Tierärztliche Diät

Selbstgekochtes / Vegetarisches Futter

Rohfutter

Im Handel erhältliches Nass- oder Trockenfutter

Bei einem im Handel erhältlichen Futtermittel geben Sie bitte den Markennamen an.

Bzw. bei selbstgekochem Futter: z.B. Hühnchen mit Reis

Wie häufig geben Sie Ihrem Hund Snacks oder Belohnungen?

❗ Bitte wählen Sie eine der folgenden Antworten:

Bitte wählen Sie nur eine der folgenden Antworten aus:

Täglich

Mehrmals die Woche

Mehrmals im Monat

Nie

Welche Ergänzungsfuttermittel geben Sie Ihrem Hund und wie häufig verabreichen Sie diese?

Bitte wählen Sie die zutreffende Antwort für jeden Punkt aus:

|                                              | nie                   | weniger<br>als<br>einmal<br>im Monat | monatlich             | wöchentlich           | täglich               |
|----------------------------------------------|-----------------------|--------------------------------------|-----------------------|-----------------------|-----------------------|
| <b>Vitamine</b>                              | <input type="radio"/> | <input type="radio"/>                | <input type="radio"/> | <input type="radio"/> | <input type="radio"/> |
| <b>Glucosamine und/ oder<br/>Chondroitin</b> | <input type="radio"/> | <input type="radio"/>                | <input type="radio"/> | <input type="radio"/> | <input type="radio"/> |
| <b>Fettsäuren oder Öle</b>                   | <input type="radio"/> | <input type="radio"/>                | <input type="radio"/> | <input type="radio"/> | <input type="radio"/> |
| <b>Lebertran</b>                             | <input type="radio"/> | <input type="radio"/>                | <input type="radio"/> | <input type="radio"/> | <input type="radio"/> |
| <b>Mittelkettige Fettsäuren</b>              | <input type="radio"/> | <input type="radio"/>                | <input type="radio"/> | <input type="radio"/> | <input type="radio"/> |
| <b>Epitaur®</b>                              | <input type="radio"/> | <input type="radio"/>                | <input type="radio"/> | <input type="radio"/> | <input type="radio"/> |
| <b>Mariendistel</b>                          | <input type="radio"/> | <input type="radio"/>                | <input type="radio"/> | <input type="radio"/> | <input type="radio"/> |
| <b>Andere</b>                                | <input type="radio"/> | <input type="radio"/>                | <input type="radio"/> | <input type="radio"/> | <input type="radio"/> |

Andere bitte hier benennen:

Bitte geben Sie Ihre Antwort hier ein:

## Angaben zum Training

Wurde mit Ihrem Hund eine Welpenschule/Welpengruppe besucht?

❗ Bitte wählen Sie eine der folgenden Antworten:

Bitte wählen Sie nur eine der folgenden Antworten aus:

- Ja
- Nein

Wie viele Stunden nahm Ihr Hund ca. an der Welpenschule/Welpengruppe teil?

Beantworten Sie diese Frage nur, wenn folgende Bedingungen erfüllt sind:

Antwort war 'Ja' bei Frage '13 [t1]' (Wurde mit Ihrem Hund eine Welpenschule/Welpengruppe besucht?)

❗ Bitte wählen Sie eine der folgenden Antworten:

Bitte wählen Sie nur eine der folgenden Antworten aus:

- 1-10 Stunden
- 11-20 Stunden
- über 20 Stunden

An welchem Training hat Ihr Hund teilgenommen? \*

Bitte wählen Sie die zutreffende Antwort für jeden Punkt aus:

|                         | <b>Keine Teilnahme</b> | <b>Teilgenommen,<br/>aber aufgehört</b> | <b>Ja, immer noch<br/>aktiv</b> |
|-------------------------|------------------------|-----------------------------------------|---------------------------------|
| <b>Obedience</b>        | <input type="radio"/>  | <input type="radio"/>                   | <input type="radio"/>           |
| <b>Agility</b>          | <input type="radio"/>  | <input type="radio"/>                   | <input type="radio"/>           |
| <b>Schutzhund</b>       | <input type="radio"/>  | <input type="radio"/>                   | <input type="radio"/>           |
| <b>Jagen</b>            | <input type="radio"/>  | <input type="radio"/>                   | <input type="radio"/>           |
| <b>Training zuhause</b> | <input type="radio"/>  | <input type="radio"/>                   | <input type="radio"/>           |
| <b>Sonstiges</b>        | <input type="radio"/>  | <input type="radio"/>                   | <input type="radio"/>           |

Bitte kreuzen sie zutreffendes an!

Bitte tragen Sie hier das "sonstige" Training ein.

Beantworten Sie diese Frage nur, wenn folgende Bedingungen erfüllt sind:

Antwort war 'Teilgenommen, aber aufgehört' oder 'Ja, immer noch aktiv' bei Frage '15 [t2]'  
(An welchem Training hat Ihr Hund teilgenommen? (Sonstiges))

Bitte geben Sie Ihre Antwort hier ein:

Wurde mit Ihrem Hund im Bezug auf die oben genannten Trainingsarten eine Prüfung abgelegt? Wenn ja, welche?

Bitte geben Sie Ihre Antwort hier ein:

z.B. Begleithundeprüfung

## Abfrage Epilepsie

Leidet Ihr Hund an epileptischen Anfällen? \*

Bitte wählen Sie nur eine der folgenden Antworten aus:

- Ja
- Nein

Epileptische Anfälle sind definiert als zwei oder mehr Anfälle, die jeweils 24 Stunden auseinander liegen.

## Weiterführende Fragen zur Epilepsie I/III

Mit welchem Alter trat der erste epileptische Anfall auf? \*

Beantworten Sie diese Frage nur, wenn folgende Bedingungen erfüllt sind:

Antwort war 'Ja' bei Frage '18 [e1]' (Leidet Ihr Hund an epileptischen Anfällen?)

🗳 Bitte wählen Sie eine der folgenden Antworten:

Bitte wählen Sie nur eine der folgenden Antworten aus:

- <1
- 1
- 2
- 3
- 4
- 5
- 6
- 7
- 8
- 9
- 10
- 11
- 12
- 13
- 14
- 15
- 16
- 17
- 18
- >18

Die Angabe des Alters erfolgt in Jahren.

Wie viele Anfälle hatte Ihr Hund schätzungsweise in den vergangenen 3 Monaten? \*

Bitte geben Sie Ihre Antwort hier ein:

Welche der folgenden Untersuchungen wurden im Falle Ihres Hundes durchgeführt, um die Epilepsie zu diagnostizieren und welche Untersuchungsergebnisse wurden ermittelt? \*

Bitte wählen Sie die zutreffende Antwort für jeden Punkt aus:

|                                                                                     | normal                | abnormal              | nicht durchgeführt    |
|-------------------------------------------------------------------------------------|-----------------------|-----------------------|-----------------------|
| <b>Blutuntersuchung<br/>(Blutbild, Blutchemie,<br/>Gallensäure usw.)</b>            | <input type="radio"/> | <input type="radio"/> | <input type="radio"/> |
| <b>Harnuntersuchung</b>                                                             | <input type="radio"/> | <input type="radio"/> | <input type="radio"/> |
| <b>Magnetresonanztomographie<br/>(MRT) des Kopfes</b>                               | <input type="radio"/> | <input type="radio"/> | <input type="radio"/> |
| <b>Computertomographie<br/>(CT) des Kopfes</b>                                      | <input type="radio"/> | <input type="radio"/> | <input type="radio"/> |
| <b>Entnahme und<br/>Untersuchung der<br/>Gehirn- und<br/>Rückenmarksflüssigkeit</b> | <input type="radio"/> | <input type="radio"/> | <input type="radio"/> |

Bitte erläutern Sie die "abnormalen" Befunde im unten stehenden Kommentarfeld ausführlicher.

Sollten Untersuchungen durchgeführt worden sein, über deren Details Sie sich unsicher sind, geben Sie im Kommentarfeld bitte "unsicher" an.

Bitte geben Sie Ihre Antwort hier ein:

Steht Ihr Hund aktuell unter antiepileptischer Dauertherapie? \*

❗ Bitte wählen Sie eine der folgenden Antworten:

Bitte wählen Sie nur eine der folgenden Antworten aus:

Ja

Nein

Erhält Ihr Hund aktuell eines oder mehrere der folgenden Medikamente?

Beantworten Sie diese Frage nur, wenn folgende Bedingungen erfüllt sind:

Antwort war 'Ja' bei Frage '23 [ep3]' (Steht Ihr Hund aktuell unter antiepileptischer Dauertherapie?)

🗨 Bitte wählen Sie die zutreffenden Antworten aus:

Bitte wählen Sie alle zutreffenden Antworten aus:

- Imepitoin (Pexion)
- Phenobarbital (Epiphen, Phenoleptil, Luminal, Luminaletten)
- Kaliumbromid (Epilease, Libromide, Dibromide)
- Levetiracetam (Keppra)
- Zonisamid
- Gabapentin
- Diazepam
- Pregabalin
- Chlorazepat
- Felbamat
- Phenytoin
- Lamotrigin
- Tiagabin
- Vigabatrin

Sonstige:

Wie ist die Dosierung der jeweiligen Medikamente?

- Häufigkeit der täglichen Gabe, Tablettenmenge und Dosierung

Beantworten Sie diese Frage nur, wenn folgende Bedingungen erfüllt sind:

Antwort war 'Ja' bei Frage '23 [ep3]' (Steht Ihr Hund aktuell unter antiepileptischer Dauertherapie?)

Bitte geben Sie Ihre Antwort hier ein:

z.B.: 2 x tgl. 1 Tablette Levetiracetam 250 mg

Mit welchen antiepileptischen Medikamenten wurde Ihr Hund in der Vergangenheit behandelt und welche Gründe lagen einem Absetzen/Wechsel der Medikamente zugrunde? \*

Bitte geben Sie Ihre Antwort hier ein:

Sollte Ihr Hund zuvor noch nicht mit anderen Medikamenten behandelt worden sein, geben sie bitte "Keine" an.

## Weiterführende Fragen zur Epilepsie II/III

Wie lange dauert ein durchschnittlicher Krampfanfall ungefähr?

❗ Bitte wählen Sie eine der folgenden Antworten:

Bitte wählen Sie nur eine der folgenden Antworten aus:

- Wenige Sekunden
- 1-2 Minuten
- 3-5 Minuten
- 6-10 Minuten
- Länger

Gemeint ist die Zeit, in der der Hund eine motorische Komponente zeigt.

z. B. Zucken, Rudern, rhythmische Kaubewegungen

Hatte Ihr Hund jemals einen Anfall mit einer Dauer von über 5 Minuten, auch als "Status epilepticus" bezeichnet?

❗ Bitte wählen Sie eine der folgenden Antworten:

Bitte wählen Sie nur eine der folgenden Antworten aus:

- Ja
- Nein, immer weniger als 5 Minuten.

Hatte Ihr Hund jemals zwei oder mehr Anfälle, ohne dass er Ihnen dazwischen in die Augen schauen konnte?

❗ Bitte wählen Sie eine der folgenden Antworten:

Bitte wählen Sie nur eine der folgenden Antworten aus:

- Ja
- Nein, noch nie.

Hatte Ihr Hund jemals mehr als einen Anfall innerhalb von 24 Stunden, auch bekannt als "Cluster-Anfälle"? \*

❗ Bitte wählen Sie eine der folgenden Antworten:

Bitte wählen Sie nur eine der folgenden Antworten aus:

- Ja, mehr als ein Anfall pro 24 Stunden
- Nein, nur ein Anfall pro 24 Stunden

Wie häufig ereignen sich die Krampfanfälle innerhalb von 24 Stunden?

Beantworten Sie diese Frage nur, wenn folgende Bedingungen erfüllt sind:

Antwort war 'Ja, mehr als ein Anfall pro 24 Stunden' bei Frage '30 [ep7]' (Hatte Ihr Hund jemals mehr als einen Anfall innerhalb von 24 Stunden, auch bekannt als "Cluster-Anfälle"?)

❗ Bitte wählen Sie eine der folgenden Antworten:

Bitte wählen Sie nur eine der folgenden Antworten aus:

- 2 zeitlich getrennte Anfälle pro 24 Stunden
- 3-5 zeitlich getrennte Anfälle pro 24 Stunden
- mehr als 5 zeitlich getrennte Anfälle pro 24 Stunden

## Weiterführende Fragen zur Epilepsie III/III

Man unterscheidet zwei Arten von Anfällen. Generalisierte Anfälle gehen mit Verkrampfung des gesamten Körpers sowie einem Bewusstseinsverlust einher. Fokale Anfälle entstehen nur in bestimmten Hirngebieten und wirken sich aus diesem Grund nur auf bestimmte Körperregionen aus. Diese können sich als "Ticks", wie plötzlich auftretendes Lecken, Zucken oder Schlucken zeigen. Wie sieht der übliche, durchschnittliche Anfall/Anfallsytp Ihres Hundes aus?

🗨 Bitte wählen Sie die zutreffenden Antworten aus:

Bitte wählen Sie alle zutreffenden Antworten aus:

- Tier fällt auf den Boden und bleibt in Seitenlage
- Tier ist ansprechbar
- Tier ist nicht ansprechbar
- Der Körper erschlafft
- Der Körper versteift sich
- Rudernde Bewegungen mit allen 4 Beinen
- Zucken mit einem Bein
- Gesichtszucken
- Kauende Maulbewegungen
- Rhythmisches Zwinkern
- Abnormale Augenbewegungen
- Vergrößerte Pupillen
- Kopfschütteln
- Exzessives Speicheln
- Erbrechen
- unkontrollierter Harnabsatz
- unkontrollierter Kotabsatz
- Krampf beginnt an einer Stelle und breitet sich auf den ganzen Körper aus
- Verschrecktes und angsterfülltes Verhalten
- Fliegenschnappen
- Sonstige:

Sind die Krampfanfälle auf einen bestimmten Körperteil begrenzt? Bzw. haben Sie jemals fokale Krampfanfälle bei Ihrem Hund beobachtet?

❗ Bitte wählen Sie eine der folgenden Antworten:

Bitte wählen Sie nur eine der folgenden Antworten aus:

Nein

Ja, auf folgenden Körperteil:

Welche Anzeichen zeigt Ihr Hund üblicherweise während der Erholungsphase nach dem Anfall?

❗ Bitte wählen Sie die zutreffenden Antworten aus:

Bitte wählen Sie alle zutreffenden Antworten aus:

Schwankend beim Laufen, "ataktisch"

Desorientiert

Erstarrt

Blind oder sieht schlecht

Schläfrig

Verängstigt

Aggressiv

Rastlos, unruhig und wandernd

Aktiv am Schnüffeln

Hungrig

Durstig

Anhänglich, möchte mehr Aufmerksamkeit als sonst

Normal – keines der oben genannten Anzeichen

Sollte sich Ihr Hund direkt nach einem Anfall vollkommen normal verhalten, wählen sie bitte „Keines der oben genannten Anzeichen“.

Wie lange braucht Ihr Hund im Durchschnitt, um sich von einem üblichen Krampfanfall zu erholen?

🗨 Bitte wählen Sie eine der folgenden Antworten:

Bitte wählen Sie nur eine der folgenden Antworten aus:

- Einige Minuten
- Bis zu 6 Stunden
- Bis zu 24 Stunden
- Bis zu 48 Stunden
- Mehr als 48 Stunden

Wann hatte Ihr Hund seinen letzten Krampfanfall? \*

🗨 Bitte wählen Sie eine der folgenden Antworten:

Bitte wählen Sie nur eine der folgenden Antworten aus:

- Innerhalb der letzten 24 Stunden
- Innerhalb der letzten 7 Tage
- Vor 8-14 Tagen
- Vor 15-21 Tagen
- Vor 22-28 Tagen
- Vor 1-3 Monaten
- Vor 4-6 Monaten
- Vor 7-12 Monaten
- Vor über 12 Monaten
- Ich weiß es nicht.

Sind abgesehen von Epilepsie weitere Erkrankungen bei Ihrem Hund bekannt? \*

❗ Bitte wählen Sie eine der folgenden Antworten:

Bitte wählen Sie nur eine der folgenden Antworten aus:

Ja

Nein

Welche zusätzlichen Erkrankungen liegen vor?

Beantworten Sie diese Frage nur, wenn folgende Bedingungen erfüllt sind:

Antwort war 'Ja' bei Frage '37 [ep11]' (Sind abgesehen von Epilepsie weitere Erkrankungen bei Ihrem Hund bekannt?)

Bitte geben Sie Ihre Antwort hier ein:

Erhält Ihr Hund aktuell andere Medikamente außer der antiepileptischen Präparate oder Impfungen/Entwurmungen? \*

🗨 Bitte wählen Sie eine der folgenden Antworten:

Bitte wählen Sie nur eine der folgenden Antworten aus:

Ja, noch weitere Medikamente

Nein

Bitte schreiben Sie einen Kommentar zu Ihrer Auswahl

Falls ja, geben Sie im Kommentarfeld bitte die Medikamente und Dosierungen an.

## Verhaltensabfrage I/II

Bitte bewerten Sie folgende Aussagen zum Verhalten Ihres Hundes.

\*

Bitte wählen Sie die zutreffende Antwort für jeden Punkt aus:

|                                                                                                                               | <b>Nie</b>            | <b>Manchmal</b>       | <b>Oft</b>            | <b>Sehr oft</b>       |
|-------------------------------------------------------------------------------------------------------------------------------|-----------------------|-----------------------|-----------------------|-----------------------|
| <b>Ihr Hund hat einen mühsamen Lernprozess, weil er unachtsam ist oder andere Dinge seine Aufmerksamkeit auf sich ziehen.</b> | <input type="radio"/> | <input type="radio"/> | <input type="radio"/> | <input type="radio"/> |
| <b>Es fällt Ihrem Hund schwer, sich auf Aufgaben oder Spiele zu konzentrieren.</b>                                            | <input type="radio"/> | <input type="radio"/> | <input type="radio"/> | <input type="radio"/> |
| <b>Ihr Hund verlässt seinen Platz, obwohl er dort bleiben soll.</b>                                                           | <input type="radio"/> | <input type="radio"/> | <input type="radio"/> | <input type="radio"/> |
| <b>Es scheint, als würde Ihr Hund nicht hören, obwohl er offensichtlich weiß, dass ihn jemand anspricht.</b>                  | <input type="radio"/> | <input type="radio"/> | <input type="radio"/> | <input type="radio"/> |

\*

Bitte wählen Sie die zutreffende Antwort für jeden Punkt aus:

|                                                                                                                                                                                                         | <b>Trifft<br/>nicht zu</b> | <b>Trifft<br/>eher<br/>nicht zu</b> | <b>Teils-teils</b>    | <b>Trifft<br/>eher zu</b> | <b>Trifft zu</b>      |
|---------------------------------------------------------------------------------------------------------------------------------------------------------------------------------------------------------|----------------------------|-------------------------------------|-----------------------|---------------------------|-----------------------|
| <b>Mein Hund zeigt extreme physische Zeichen, wenn er aufgeregt ist (z.B. Sabbern, Hecheln, Nackenhaar aufstellen, Urinieren, Lippen lecken, Augen aufreißen)</b>                                       | <input type="radio"/>      | <input type="radio"/>               | <input type="radio"/> | <input type="radio"/>     | <input type="radio"/> |
| <b>Wenn mein Hund sich aufregt, kann es dazu führen, dass er festes repetitives Verhalten zeigt (d.h. eine Handlung wird auf die gleiche Weise wiederholt; z.B. Schwanz jagen oder im Kreis drehen)</b> | <input type="radio"/>      | <input type="radio"/>               | <input type="radio"/> | <input type="radio"/>     | <input type="radio"/> |
| <b>Mein Hund beruhigt sich sehr schnell, nachdem er aufgeregt war.</b>                                                                                                                                  | <input type="radio"/>      | <input type="radio"/>               | <input type="radio"/> | <input type="radio"/>     | <input type="radio"/> |

|                                                                                                                                                                                                                                       | <b>Trifft<br/>nicht zu</b> | <b>Trifft eher<br/>nicht zu</b> | <b>Teils-teils</b>    | <b>Trifft eher<br/>zu</b> | <b>Trifft zu</b>      |
|---------------------------------------------------------------------------------------------------------------------------------------------------------------------------------------------------------------------------------------|----------------------------|---------------------------------|-----------------------|---------------------------|-----------------------|
| <b>Ich würde meinen Hund<br/>als sehr impulsiv<br/>einschätzen (d.h. er hat<br/>einen plötzlichen,<br/>starken Drang zu<br/>handeln; handelt ohne<br/>Voraussicht; handelt<br/>ohne Beachtung der<br/>Folgen seines<br/>Handelns)</b> | <input type="radio"/>      | <input type="radio"/>           | <input type="radio"/> | <input type="radio"/>     | <input type="radio"/> |
| <b>Mein Hund scheint sich<br/>ohne Grund<br/>aufzuregen.</b>                                                                                                                                                                          | <input type="radio"/>      | <input type="radio"/>           | <input type="radio"/> | <input type="radio"/>     | <input type="radio"/> |

## Verhaltensabfrage II/II

Bitte bewerten Sie folgende Aussagen zum Verhalten Ihres Hundes.

\*

Bitte wählen Sie die zutreffende Antwort für jeden Punkt aus:

|                                                                                                      | Niemals               | Einmal<br>im Monat    | Einmal in<br>der<br>Woche | Einmal<br>am Tag      | Mehrmals<br>am Tag    |
|------------------------------------------------------------------------------------------------------|-----------------------|-----------------------|---------------------------|-----------------------|-----------------------|
| Wie oft geht Ihr Hund auf und ab, läuft im Kreis und/oder wandert ohne Richtung und Ziel umher?      | <input type="radio"/> | <input type="radio"/> | <input type="radio"/>     | <input type="radio"/> | <input type="radio"/> |
| Wie oft starrt Ihr Hund leer auf Wände oder den Fußboden?                                            | <input type="radio"/> | <input type="radio"/> | <input type="radio"/>     | <input type="radio"/> | <input type="radio"/> |
| Wie oft steckt Ihr Hund hinter Objekten fest und ist nicht dazu in der Lage, sich zu befreien?       | <input type="radio"/> | <input type="radio"/> | <input type="radio"/>     | <input type="radio"/> | <input type="radio"/> |
| Wie oft kommt es vor, dass Ihr Hund Familienmitglieder (Menschen oder Tiere) nicht wahrnimmt?        | <input type="radio"/> | <input type="radio"/> | <input type="radio"/>     | <input type="radio"/> | <input type="radio"/> |
| Wie oft läuft Ihr Hund gegen Wände oder Türen?                                                       | <input type="radio"/> | <input type="radio"/> | <input type="radio"/>     | <input type="radio"/> | <input type="radio"/> |
| Wie oft läuft Ihr Hund davon, während Sie ihn streicheln, oder vermeidet es, gestreichelt zu werden? | <input type="radio"/> | <input type="radio"/> | <input type="radio"/>     | <input type="radio"/> | <input type="radio"/> |

\*

Bitte wählen Sie die zutreffende Antwort für jeden Punkt aus:

|                                                                                                      | <b>Niemals</b>        | <b>1-30 %<br/>der Zeit</b> | <b>31-60 %<br/>der Zeit</b> | <b>61-99 %<br/>der Zeit</b> | <b>Immer</b>          |
|------------------------------------------------------------------------------------------------------|-----------------------|----------------------------|-----------------------------|-----------------------------|-----------------------|
| <b>Hat Ihr Hund Probleme<br/>damit Futter zu finden,<br/>welches auf den Boden<br/>gefallen ist?</b> | <input type="radio"/> | <input type="radio"/>      | <input type="radio"/>       | <input type="radio"/>       | <input type="radio"/> |

\*

Bitte wählen Sie die zutreffende Antwort für jeden Punkt aus:

|                                                                                                                               | <b>Viel<br/>weniger</b> | <b>Etwas<br/>weniger</b> | <b>Gleichbleibend</b> | <b>Etwas<br/>mehr</b> | <b>Viel mehr</b>      |
|-------------------------------------------------------------------------------------------------------------------------------|-------------------------|--------------------------|-----------------------|-----------------------|-----------------------|
| <b>Verglichen mit den letzten 6 Monaten:<br/>Läuft Ihr Hund auf und ab, in Kreisen und/oder wandert ohne Grund umher?</b>     | <input type="radio"/>   | <input type="radio"/>    | <input type="radio"/> | <input type="radio"/> | <input type="radio"/> |
| <b>Verglichen mit den letzten 6 Monaten:<br/>Startt Ihr Hund leer auf Wände oder Fußböden?</b>                                | <input type="radio"/>   | <input type="radio"/>    | <input type="radio"/> | <input type="radio"/> | <input type="radio"/> |
| <b>Verglichen mit den letzten 6 Monaten:<br/>Uriniert oder kotet Ihr Hund in Bereiche, die er vorher sauber gehalten hat?</b> | <input type="radio"/>   | <input type="radio"/>    | <input type="radio"/> | <input type="radio"/> | <input type="radio"/> |
| <b>Verglichen mit den letzten 6 Monaten: Hat Ihr Hund Probleme, heruntergefallenes Futter auf dem Boden zu finden?</b>        | <input type="radio"/>   | <input type="radio"/>    | <input type="radio"/> | <input type="radio"/> | <input type="radio"/> |
| <b>Verglichen mit den letzten 6 Monaten:<br/>Nimmt Ihr Hund Familienmitglieder nicht mehr wahr?</b>                           | <input type="radio"/>   | <input type="radio"/>    | <input type="radio"/> | <input type="radio"/> | <input type="radio"/> |
| <b>Verglichen mit den letzten 6 Monaten: Wie aktiv ist Ihr Hund?</b>                                                          | <input type="radio"/>   | <input type="radio"/>    | <input type="radio"/> | <input type="radio"/> | <input type="radio"/> |

# Verhaltensprofil (C-BARQ 1)

Wie oft macht Ihr Hund Folgendes? \*

Bitte wählen Sie die zutreffende Antwort für jeden Punkt aus:

|                                                                                        | Niemals               | Selten                | Manchmal              | Gewöhnlich            | Immer                 |
|----------------------------------------------------------------------------------------|-----------------------|-----------------------|-----------------------|-----------------------|-----------------------|
| <b>Kommt auf Rufen sofort zurück, wenn er nicht an der Leine ist.</b>                  | <input type="radio"/> | <input type="radio"/> | <input type="radio"/> | <input type="radio"/> | <input type="radio"/> |
| <b>Gehorcht umgehend auf "Sitz".</b>                                                   | <input type="radio"/> | <input type="radio"/> | <input type="radio"/> | <input type="radio"/> | <input type="radio"/> |
| <b>Gehorcht umgehend auf "Bleib".</b>                                                  | <input type="radio"/> | <input type="radio"/> | <input type="radio"/> | <input type="radio"/> | <input type="radio"/> |
| <b>Holt oder versucht Stöcke, Bälle oder Ähnliches zu bringen.</b>                     | <input type="radio"/> | <input type="radio"/> | <input type="radio"/> | <input type="radio"/> | <input type="radio"/> |
| <b>Scheint an allem teilzunehmen oder aufmerksam zuzuhören, was ich tue oder sage.</b> | <input type="radio"/> | <input type="radio"/> | <input type="radio"/> | <input type="radio"/> | <input type="radio"/> |
| <b>Ist langsam darin, auf ein Verbot oder eine Belehrung zu reagieren.</b>             | <input type="radio"/> | <input type="radio"/> | <input type="radio"/> | <input type="radio"/> | <input type="radio"/> |
| <b>Ist langsam darin, neue Tricks oder Fähigkeiten zu erlernen.</b>                    | <input type="radio"/> | <input type="radio"/> | <input type="radio"/> | <input type="radio"/> | <input type="radio"/> |
| <b>Wird leicht von interessanten Anblicken, Geräuschen oder Düften abgelenkt.</b>      | <input type="radio"/> | <input type="radio"/> | <input type="radio"/> | <input type="radio"/> | <input type="radio"/> |

Reagiert Ihr Hund jemals aggressiv in den folgenden Situationen? \*

Bitte wählen Sie die zutreffende Antwort für jeden Punkt aus:

|                                                                                                                            | Niemals               | Selten                | Manchmal              | Gewöhnlich            | Immer                 |
|----------------------------------------------------------------------------------------------------------------------------|-----------------------|-----------------------|-----------------------|-----------------------|-----------------------|
| <b>Wenn sich ein unbekannter männlicher Erwachsener nähert, während Sie Gassi gehen oder er an der Leine geführt wird.</b> | <input type="radio"/> | <input type="radio"/> | <input type="radio"/> | <input type="radio"/> | <input type="radio"/> |
| <b>Wenn sich eine unbekannte weibliche Erwachsene nähert, während Sie Gassi gehen oder er an der Leine geführt wird.</b>   | <input type="radio"/> | <input type="radio"/> | <input type="radio"/> | <input type="radio"/> | <input type="radio"/> |
| <b>Wenn sich ein unbekanntes Kind nähert, während Sie Gassi gehen oder er an der Leine geführt wird.</b>                   | <input type="radio"/> | <input type="radio"/> | <input type="radio"/> | <input type="radio"/> | <input type="radio"/> |
| <b>Gegenüber unbekanntem Personen, die sich Ihrem Hund nähern, während er in Ihrem Auto ist.</b>                           | <input type="radio"/> | <input type="radio"/> | <input type="radio"/> | <input type="radio"/> | <input type="radio"/> |
| <b>Wenn sich zu Hause eine unbekannte Person dem Besitzer oder einem anderen Familienmitglied nähert.</b>                  | <input type="radio"/> | <input type="radio"/> | <input type="radio"/> | <input type="radio"/> | <input type="radio"/> |

|                                                                                                                     | <b>Niemals</b>        | <b>Selten</b>         | <b>Manchmal</b>       | <b>Gewöhnlich</b>     | <b>Immer</b>          |
|---------------------------------------------------------------------------------------------------------------------|-----------------------|-----------------------|-----------------------|-----------------------|-----------------------|
| <b>Wenn sich auswärts eine unbekannte Person dem Besitzer oder einem anderen Familienmitglied nähert.</b>           | <input type="radio"/> | <input type="radio"/> | <input type="radio"/> | <input type="radio"/> | <input type="radio"/> |
| <b>Wenn der Postbote oder andere Lieferanten sich dem Zuhause nähern.</b>                                           | <input type="radio"/> | <input type="radio"/> | <input type="radio"/> | <input type="radio"/> | <input type="radio"/> |
| <b>Wenn Fremde am Zuhause vorbeilaufen, während der Hund im Garten ist.</b>                                         | <input type="radio"/> | <input type="radio"/> | <input type="radio"/> | <input type="radio"/> | <input type="radio"/> |
| <b>Wenn Jogger, Fahrradfahrer oder Rollschuhfahrer das Zuhause passieren, während der Hund im Garten ist.</b>       | <input type="radio"/> | <input type="radio"/> | <input type="radio"/> | <input type="radio"/> | <input type="radio"/> |
| <b>Gegenüber unbekannt Personen, die den Besitzer zu Hause besuchen.</b>                                            | <input type="radio"/> | <input type="radio"/> | <input type="radio"/> | <input type="radio"/> | <input type="radio"/> |
| <b>Wenn sich ein unbekannter männlicher Hund nähert, während Sie Gassi gehen oder er an der Leine geführt wird.</b> | <input type="radio"/> | <input type="radio"/> | <input type="radio"/> | <input type="radio"/> | <input type="radio"/> |
| <b>Wenn sich ein unbekannter weiblicher Hund nähert, während Sie Gassi gehen oder er an der Leine geführt wird.</b> | <input type="radio"/> | <input type="radio"/> | <input type="radio"/> | <input type="radio"/> | <input type="radio"/> |

|                                                                | <b>Niemals</b>        | <b>Selten</b>         | <b>Manchmal</b>       | <b>Gewöhnlich</b>     | <b>Immer</b>          |
|----------------------------------------------------------------|-----------------------|-----------------------|-----------------------|-----------------------|-----------------------|
| <b>Gegenüber unbekanntem Hunden, die das Zuhause besuchen.</b> | <input type="radio"/> | <input type="radio"/> | <input type="radio"/> | <input type="radio"/> | <input type="radio"/> |

Reagiert Ihr Hund jemals mit aggressivem Verhalten auf die folgenden Situationen? \*

Bitte wählen Sie die zutreffende Antwort für jeden Punkt aus:

|                                                                                                              | Niemals               | Selten                | Manchmal              | Gewöhnlich            | Immer                 |
|--------------------------------------------------------------------------------------------------------------|-----------------------|-----------------------|-----------------------|-----------------------|-----------------------|
| Wenn der Hund durch ein Haushaltsmitglied belehrt oder bestraft wird.                                        | <input type="radio"/> | <input type="radio"/> | <input type="radio"/> | <input type="radio"/> | <input type="radio"/> |
| Wenn dem Hund das Spielzeug, der Knochen oder andere Objekte durch ein Haushaltsmitglied weggenommen werden. | <input type="radio"/> | <input type="radio"/> | <input type="radio"/> | <input type="radio"/> | <input type="radio"/> |
| Wenn der Hund durch ein Haushaltsmitglied gebadet oder gepflegt wird.                                        | <input type="radio"/> | <input type="radio"/> | <input type="radio"/> | <input type="radio"/> | <input type="radio"/> |
| Wenn der Hund sich direkt einem Haushaltsmitglied nähert, während dieses etwas isst.                         | <input type="radio"/> | <input type="radio"/> | <input type="radio"/> | <input type="radio"/> | <input type="radio"/> |
| Wenn dem Hund durch ein Haushaltsmitglied das Essen weggenommen wird.                                        | <input type="radio"/> | <input type="radio"/> | <input type="radio"/> | <input type="radio"/> | <input type="radio"/> |
| Wenn der Hund durch ein Haushaltsmitglied angestarrt wird.                                                   | <input type="radio"/> | <input type="radio"/> | <input type="radio"/> | <input type="radio"/> | <input type="radio"/> |
| Wenn ein Haushaltsmitglied über den Hund hinweg steigt.                                                      | <input type="radio"/> | <input type="radio"/> | <input type="radio"/> | <input type="radio"/> | <input type="radio"/> |

|                                                                                                       | <b>Niemals</b>        | <b>Selten</b>         | <b>Manchmal</b>       | <b>Gewöhnlich</b>     | <b>Immer</b>          |
|-------------------------------------------------------------------------------------------------------|-----------------------|-----------------------|-----------------------|-----------------------|-----------------------|
| <b>Wenn ein Haushaltsmitglied dem Hund gestohlenen Futter/Essen oder Gegenstände wieder wegnimmt.</b> | <input type="radio"/> | <input type="radio"/> | <input type="radio"/> | <input type="radio"/> | <input type="radio"/> |

## Verhaltensprofil (C-BARQ 2)

Bitte beurteilen Sie die folgenden Situationen danach, wie wahrscheinlich Ihr Hund mit angespanntem oder angsterfülltem Verhalten darauf reagieren würde. \*

Bitte wählen Sie die zutreffende Antwort für jeden Punkt aus:

|                                                                                                   | <b>Niemals</b>        | <b>Selten</b>         | <b>Manchmal</b>       | <b>Gewöhnlich</b>     | <b>Immer</b>          |
|---------------------------------------------------------------------------------------------------|-----------------------|-----------------------|-----------------------|-----------------------|-----------------------|
| <b>Wenn sich ein unbekannter Mann Ihrem Zuhause nähert, während Sie nicht anwesend sind.</b>      | <input type="radio"/> | <input type="radio"/> | <input type="radio"/> | <input type="radio"/> | <input type="radio"/> |
| <b>Wenn sich eine unbekannte Frau Ihrem Zuhause nähert, während Sie nicht anwesend sind.</b>      | <input type="radio"/> | <input type="radio"/> | <input type="radio"/> | <input type="radio"/> | <input type="radio"/> |
| <b>Wenn sich ein unbekanntes Kind Ihrem Zuhause nähert, während Sie nicht anwesend sind.</b>      | <input type="radio"/> | <input type="radio"/> | <input type="radio"/> | <input type="radio"/> | <input type="radio"/> |
| <b>Wenn eine unbekannte Person Sie in Ihrem Zuhause besucht.</b>                                  | <input type="radio"/> | <input type="radio"/> | <input type="radio"/> | <input type="radio"/> | <input type="radio"/> |
| <b>In Erwiderung auf schlagartigen oder lauten Krach.</b>                                         | <input type="radio"/> | <input type="radio"/> | <input type="radio"/> | <input type="radio"/> | <input type="radio"/> |
| <b>Bei starkem Verkehr.</b>                                                                       | <input type="radio"/> | <input type="radio"/> | <input type="radio"/> | <input type="radio"/> | <input type="radio"/> |
| <b>Als Antwort auf merkwürdige oder unbekannte Objekte auf dem oder in der Nähe des Gehweges.</b> | <input type="radio"/> | <input type="radio"/> | <input type="radio"/> | <input type="radio"/> | <input type="radio"/> |
| <b>Während eines Gewitters.</b>                                                                   | <input type="radio"/> | <input type="radio"/> | <input type="radio"/> | <input type="radio"/> | <input type="radio"/> |

|                                                                                  | <b>Niemals</b>        | <b>Selten</b>         | <b>Manchmal</b>       | <b>Gewöhnlich</b>     | <b>Immer</b>          |
|----------------------------------------------------------------------------------|-----------------------|-----------------------|-----------------------|-----------------------|-----------------------|
| <b>Wenn Ihr Hund erstmals einer neuen, unbekanntem Situation ausgesetzt ist.</b> | <input type="radio"/> | <input type="radio"/> | <input type="radio"/> | <input type="radio"/> | <input type="radio"/> |
| <b>Als Erwiderung auf Wind oder winddurchströmte, bewegte Gegenstände.</b>       | <input type="radio"/> | <input type="radio"/> | <input type="radio"/> | <input type="radio"/> | <input type="radio"/> |

Zeigt Ihr Hund folgende Verhaltensweisen? \*

Bitte wählen Sie die zutreffende Antwort für jeden Punkt aus:

|                                                                                                                                 | Niemals               | Selten                | Manchmal              | Gewöhnlich            | Immer                 |
|---------------------------------------------------------------------------------------------------------------------------------|-----------------------|-----------------------|-----------------------|-----------------------|-----------------------|
| <b>Schütteln, Schlottern oder Zittern, wenn er alleine ist oder kurz bevor er alleine gelassen wird.</b>                        | <input type="radio"/> | <input type="radio"/> | <input type="radio"/> | <input type="radio"/> | <input type="radio"/> |
| <b>Übermäßiges Sabbern, wenn er alleine ist oder kurz bevor er alleine gelassen wird.</b>                                       | <input type="radio"/> | <input type="radio"/> | <input type="radio"/> | <input type="radio"/> | <input type="radio"/> |
| <b>Unruhe, Aufregung oder Drangwandern, wenn er alleine ist oder kurz bevor er alleine gelassen wird.</b>                       | <input type="radio"/> | <input type="radio"/> | <input type="radio"/> | <input type="radio"/> | <input type="radio"/> |
| <b>Winseln, wenn er alleine ist oder kurz bevor er alleine gelassen wird.</b>                                                   | <input type="radio"/> | <input type="radio"/> | <input type="radio"/> | <input type="radio"/> | <input type="radio"/> |
| <b>Bellen, wenn er alleine ist oder kurz bevor er alleine gelassen wird.</b>                                                    | <input type="radio"/> | <input type="radio"/> | <input type="radio"/> | <input type="radio"/> | <input type="radio"/> |
| <b>Heulen, wenn er alleine ist oder kurz bevor er alleine gelassen wird.</b>                                                    | <input type="radio"/> | <input type="radio"/> | <input type="radio"/> | <input type="radio"/> | <input type="radio"/> |
| <b>Kauen oder Kratzen an Tür, Boden, Fenstern oder Vorhängen, wenn er alleine ist oder kurz bevor er alleine gelassen wird.</b> | <input type="radio"/> | <input type="radio"/> | <input type="radio"/> | <input type="radio"/> | <input type="radio"/> |

|                                                                                      | <b>Niemals</b>        | <b>Selten</b>         | <b>Manchmal</b>       | <b>Gewöhnlich</b>     | <b>Immer</b>          |
|--------------------------------------------------------------------------------------|-----------------------|-----------------------|-----------------------|-----------------------|-----------------------|
| <b>Appetitverlust, wenn er alleine ist oder kurz bevor er alleine gelassen wird.</b> | <input type="radio"/> | <input type="radio"/> | <input type="radio"/> | <input type="radio"/> | <input type="radio"/> |

Was beschreibt das Verhalten Ihres Hundes am besten? \*

Bitte wählen Sie die zutreffende Antwort für jeden Punkt aus:

|                                                                                                                             | Niemals               | Selten                | Manchmal              | Gewöhnlich            | Immer                 |
|-----------------------------------------------------------------------------------------------------------------------------|-----------------------|-----------------------|-----------------------|-----------------------|-----------------------|
| <b>Zeigt eine besondere Anhänglichkeit zu einem bestimmten Haushaltsmitglied.</b>                                           | <input type="radio"/> | <input type="radio"/> | <input type="radio"/> | <input type="radio"/> | <input type="radio"/> |
| <b>Neigt dazu einem Haushaltsmitglied von Raum zu Raum innerhalb des Hauses zu folgen.</b>                                  | <input type="radio"/> | <input type="radio"/> | <input type="radio"/> | <input type="radio"/> | <input type="radio"/> |
| <b>Tendiert dazu in der Nähe oder in Kontakt zu einem Haushaltsmitglied zu sitzen, wenn dieses sich hinsetzt.</b>           | <input type="radio"/> | <input type="radio"/> | <input type="radio"/> | <input type="radio"/> | <input type="radio"/> |
| <b>Neigt dazu ein Haushaltsmitglied anzustupsen, sich anzuschmiegen oder die Pfote zu geben, wenn dieses sich hinsetzt.</b> | <input type="radio"/> | <input type="radio"/> | <input type="radio"/> | <input type="radio"/> | <input type="radio"/> |
| <b>Wird unruhig und aufgeregt, wenn ein Haushaltsmitglied einer anderen Person Zuwendung schenkt.</b>                       | <input type="radio"/> | <input type="radio"/> | <input type="radio"/> | <input type="radio"/> | <input type="radio"/> |
| <b>Wird unruhig und aufgeregt, wenn ein Haushaltsmitglied einer anderen Hund oder Tier Zuwendung zeigt.</b>                 | <input type="radio"/> | <input type="radio"/> | <input type="radio"/> | <input type="radio"/> | <input type="radio"/> |

|                                                                                                        | <b>Niemals</b>        | <b>Selten</b>         | <b>Manchmal</b>       | <b>Gewöhnlich</b>     | <b>Immer</b>          |
|--------------------------------------------------------------------------------------------------------|-----------------------|-----------------------|-----------------------|-----------------------|-----------------------|
| <b>Reagiert aggressiv gegenüber Katzen, Eichhörnchen oder anderen Tieren, die den Garten betreten.</b> | <input type="radio"/> | <input type="radio"/> | <input type="radio"/> | <input type="radio"/> | <input type="radio"/> |
| <b>Jagt Katzen, wenn er die Möglichkeit dazu hat.</b>                                                  | <input type="radio"/> | <input type="radio"/> | <input type="radio"/> | <input type="radio"/> | <input type="radio"/> |
| <b>Jagt Vögel , wenn er die Möglichkeit dazu hat.</b>                                                  | <input type="radio"/> | <input type="radio"/> | <input type="radio"/> | <input type="radio"/> | <input type="radio"/> |
| <b>Jagt Eichhörnchen oder andere kleine Tiere, wenn er die Möglichkeit dazu hat.</b>                   | <input type="radio"/> | <input type="radio"/> | <input type="radio"/> | <input type="radio"/> | <input type="radio"/> |

## Verhaltensprofil (C-BARQ 3)

Antwortet Ihr Hund in den folgenden Situationen auf eine enorm erregte, aufgeregte Weise?

\*

Bitte wählen Sie die zutreffende Antwort für jeden Punkt aus:

|                                                                        | <b>Niemals</b>        | <b>Selten</b>         | <b>Manchmal</b>       | <b>Gewöhnlich</b>     | <b>Immer</b>          |
|------------------------------------------------------------------------|-----------------------|-----------------------|-----------------------|-----------------------|-----------------------|
| <b>Wenn ein Haushaltsmitglied nach kurzer Abwesenheit zurückkehrt.</b> | <input type="radio"/> | <input type="radio"/> | <input type="radio"/> | <input type="radio"/> | <input type="radio"/> |
| <b>Wenn ein Haushaltsmitglied mit dem Hund spielt.</b>                 | <input type="radio"/> | <input type="radio"/> | <input type="radio"/> | <input type="radio"/> | <input type="radio"/> |
| <b>Wenn es an der Tür klingelt.</b>                                    | <input type="radio"/> | <input type="radio"/> | <input type="radio"/> | <input type="radio"/> | <input type="radio"/> |
| <b>Direkt bevor er zum Gassi gehen ausgeführt wird.</b>                | <input type="radio"/> | <input type="radio"/> | <input type="radio"/> | <input type="radio"/> | <input type="radio"/> |
| <b>Kurz bevor man mit dem Hund eine Autofahrt unternimmt.</b>          | <input type="radio"/> | <input type="radio"/> | <input type="radio"/> | <input type="radio"/> | <input type="radio"/> |
| <b>Wenn Besucher im Zuhause eintreffen.</b>                            | <input type="radio"/> | <input type="radio"/> | <input type="radio"/> | <input type="radio"/> | <input type="radio"/> |

Reagiert Ihr Hund ängstlich oder verunsichert auf die folgenden Situationen? \*

Bitte wählen Sie die zutreffende Antwort für jeden Punkt aus:

|                                                                             | <b>Niemals</b>        | <b>Selten</b>         | <b>Manchmal</b>       | <b>Gewöhnlich</b>     | <b>Immer</b>          |
|-----------------------------------------------------------------------------|-----------------------|-----------------------|-----------------------|-----------------------|-----------------------|
| <b>Wenn der Hund von einem Tierarzt untersucht oder behandelt wird.</b>     | <input type="radio"/> | <input type="radio"/> | <input type="radio"/> | <input type="radio"/> | <input type="radio"/> |
| <b>Wenn er von einem Haushaltsmitglied die Krallen geschnitten bekommt.</b> | <input type="radio"/> | <input type="radio"/> | <input type="radio"/> | <input type="radio"/> | <input type="radio"/> |
| <b>Wenn er von einem Haushaltsmitglied gepflegt oder gebadet wird.</b>      | <input type="radio"/> | <input type="radio"/> | <input type="radio"/> | <input type="radio"/> | <input type="radio"/> |
| <b>Wenn sich ein ähnlich großer oder größerer unbekannter Hund nähert.</b>  | <input type="radio"/> | <input type="radio"/> | <input type="radio"/> | <input type="radio"/> | <input type="radio"/> |
| <b>Wenn sich ein unbekannter Hund von kleinerer Größe nähert.</b>           | <input type="radio"/> | <input type="radio"/> | <input type="radio"/> | <input type="radio"/> | <input type="radio"/> |

## Lebensqualität 1

Bitte geben Sie an, welche Nebenwirkungen der Antiepileptika in den letzten 3 Monaten auftraten und wie stark die Ausprägung war. \*

Bitte wählen Sie die zutreffende Antwort für jeden Punkt aus:

|                                                                     | <b>Trat<br/>nicht<br/>auf</b> | <b>Sehr<br/>gering</b> | <b>Gering</b>         | <b>Mäßig</b>          | <b>Schwer</b>         | <b>Sehr<br/>schwer</b> |
|---------------------------------------------------------------------|-------------------------------|------------------------|-----------------------|-----------------------|-----------------------|------------------------|
| <b>Gesteigerter Appetit/<br/>Gesteigerte<br/>Futtermaufnahme</b>    | <input type="radio"/>         | <input type="radio"/>  | <input type="radio"/> | <input type="radio"/> | <input type="radio"/> | <input type="radio"/>  |
| <b>Gewichtszunahme</b>                                              | <input type="radio"/>         | <input type="radio"/>  | <input type="radio"/> | <input type="radio"/> | <input type="radio"/> | <input type="radio"/>  |
| <b>Gesteigerte<br/>Wasseraufnahme</b>                               | <input type="radio"/>         | <input type="radio"/>  | <input type="radio"/> | <input type="radio"/> | <input type="radio"/> | <input type="radio"/>  |
| <b>Gesteigerter<br/>Harnabsatz</b>                                  | <input type="radio"/>         | <input type="radio"/>  | <input type="radio"/> | <input type="radio"/> | <input type="radio"/> | <input type="radio"/>  |
| <b>Vermehrtes Schlafen</b>                                          | <input type="radio"/>         | <input type="radio"/>  | <input type="radio"/> | <input type="radio"/> | <input type="radio"/> | <input type="radio"/>  |
| <b>Koordinationsprobleme<br/>beim Laufen/<br/>schwankender Gang</b> | <input type="radio"/>         | <input type="radio"/>  | <input type="radio"/> | <input type="radio"/> | <input type="radio"/> | <input type="radio"/>  |
| <b>Unruhe/ Drangwandern</b>                                         | <input type="radio"/>         | <input type="radio"/>  | <input type="radio"/> | <input type="radio"/> | <input type="radio"/> | <input type="radio"/>  |
| <b>Juckreiz/<br/>Hautrötungen</b>                                   | <input type="radio"/>         | <input type="radio"/>  | <input type="radio"/> | <input type="radio"/> | <input type="radio"/> | <input type="radio"/>  |
| <b>Erbrechen</b>                                                    | <input type="radio"/>         | <input type="radio"/>  | <input type="radio"/> | <input type="radio"/> | <input type="radio"/> | <input type="radio"/>  |
| <b>Durchfall</b>                                                    | <input type="radio"/>         | <input type="radio"/>  | <input type="radio"/> | <input type="radio"/> | <input type="radio"/> | <input type="radio"/>  |
| <b>Husten</b>                                                       | <input type="radio"/>         | <input type="radio"/>  | <input type="radio"/> | <input type="radio"/> | <input type="radio"/> | <input type="radio"/>  |

\*

Bitte wählen Sie die zutreffende Antwort für jeden Punkt aus:

|                                                                                                | <b>Stimmt</b>         | <b>Stimmt<br/>überwiegendeilweise</b> | <b>Stimmt<br/>weniger</b> | <b>Stimmt<br/>nicht</b> |
|------------------------------------------------------------------------------------------------|-----------------------|---------------------------------------|---------------------------|-------------------------|
| <b>Die oben genannten<br/>Nebenwirkungen<br/>bewerten Sie insgesamt<br/>als schwerwiegend.</b> | <input type="radio"/> | <input type="radio"/>                 | <input type="radio"/>     | <input type="radio"/>   |
| <b>Die Nebenwirkungen<br/>der Antiepileptika<br/>waren akzeptabel.</b>                         | <input type="radio"/> | <input type="radio"/>                 | <input type="radio"/>     | <input type="radio"/>   |

Bitte geben Sie an, wie oft die Pflege Ihres Hundes mit idiopathischer Epilepsie in den letzten 3 Monaten Ihr eigenes Leben eingeschränkt hat. \*

Bitte wählen Sie die zutreffende Antwort für jeden Punkt aus:

|                                                                                                                                                         | <b>Nie</b>            | <b>Selten</b>         | <b>Manchmal</b>       | <b>Oft</b>            | <b>Sehr oft</b>       |
|---------------------------------------------------------------------------------------------------------------------------------------------------------|-----------------------|-----------------------|-----------------------|-----------------------|-----------------------|
| <b>Wie oft hatten Sie das Gefühl, dass die Epilepsie Ihres Hundes im Konflikt mit Ihrer Arbeit / Ausbildung oder Ihren täglichen Aktivitäten steht?</b> | <input type="radio"/> | <input type="radio"/> | <input type="radio"/> | <input type="radio"/> | <input type="radio"/> |
| <b>Wie oft hatten Sie das Gefühl, dass die Epilepsie Ihres Hundes Ihr soziales Leben einschränkt?</b>                                                   | <input type="radio"/> | <input type="radio"/> | <input type="radio"/> | <input type="radio"/> | <input type="radio"/> |
| <b>Wie oft hatten Sie das Gefühl, dass die Epilepsie Ihres Hundes Ihre Unabhängigkeit einschränkt?</b>                                                  | <input type="radio"/> | <input type="radio"/> | <input type="radio"/> | <input type="radio"/> | <input type="radio"/> |

## Lebensqualität 2

Bitte bewerten Sie als Besitzer Ihre Angst über das Auftreten eines Anfalls und über die Auswirkungen auf Ihren Hund in den letzten 3 Monaten. \*

Bitte wählen Sie die zutreffende Antwort für jeden Punkt aus:

|                                                                            | <b>Überhaupt<br/>nicht</b> | <b>Leicht</b>         | <b>Mäßig</b>          | <b>Stark</b>          | <b>Sehr<br/>stark</b> |
|----------------------------------------------------------------------------|----------------------------|-----------------------|-----------------------|-----------------------|-----------------------|
| <b>Wie sehr waren Sie<br/>über die Häufigkeit der<br/>Anfälle besorgt?</b> | <input type="radio"/>      | <input type="radio"/> | <input type="radio"/> | <input type="radio"/> | <input type="radio"/> |
| <b>Wie sehr waren Sie<br/>über die Schwere der<br/>Anfälle besorgt?</b>    | <input type="radio"/>      | <input type="radio"/> | <input type="radio"/> | <input type="radio"/> | <input type="radio"/> |

Wie sehr haben Sie folgende Nebenwirkungen der Antiepileptika in den vergangenen 3 Monaten gestört? \*

Bitte wählen Sie die zutreffende Antwort für jeden Punkt aus:

|                                                                     | <b>Überhaupt<br/>nicht</b> | <b>Leicht</b>         | <b>Mäßig</b>          | <b>Stark</b>          | <b>Sehr<br/>stark</b> |
|---------------------------------------------------------------------|----------------------------|-----------------------|-----------------------|-----------------------|-----------------------|
| <b>Gesteigerter Appetit/<br/>Gesteigerte<br/>Futteraufnahme</b>     | <input type="radio"/>      | <input type="radio"/> | <input type="radio"/> | <input type="radio"/> | <input type="radio"/> |
| <b>Gewichtszunahme</b>                                              | <input type="radio"/>      | <input type="radio"/> | <input type="radio"/> | <input type="radio"/> | <input type="radio"/> |
| <b>Gesteigerte<br/>Wasseraufnahme</b>                               | <input type="radio"/>      | <input type="radio"/> | <input type="radio"/> | <input type="radio"/> | <input type="radio"/> |
| <b>Gesteigerter<br/>Harnabsatz</b>                                  | <input type="radio"/>      | <input type="radio"/> | <input type="radio"/> | <input type="radio"/> | <input type="radio"/> |
| <b>Vermehrtes Schlafen</b>                                          | <input type="radio"/>      | <input type="radio"/> | <input type="radio"/> | <input type="radio"/> | <input type="radio"/> |
| <b>Koordinationsprobleme<br/>beim Laufen/<br/>schwankender Gang</b> | <input type="radio"/>      | <input type="radio"/> | <input type="radio"/> | <input type="radio"/> | <input type="radio"/> |
| <b>Unruhe/ Drangwandern</b>                                         | <input type="radio"/>      | <input type="radio"/> | <input type="radio"/> | <input type="radio"/> | <input type="radio"/> |
| <b>Husten</b>                                                       | <input type="radio"/>      | <input type="radio"/> | <input type="radio"/> | <input type="radio"/> | <input type="radio"/> |

Bitte bewerten Sie Ihre Abneigung gegenüber den Nebenwirkungen der Antiepileptika auf Ihren Hund. \*

Bitte wählen Sie die zutreffende Antwort für jeden Punkt aus:

|                                                                                      | <b>Überhaupt<br/>nicht<br/>störend</b> | <b>Geringgradig<br/>störend</b> | <b>Störend</b>        | <b>Besonders<br/>störend</b> | <b>Extrem<br/>störend</b> |
|--------------------------------------------------------------------------------------|----------------------------------------|---------------------------------|-----------------------|------------------------------|---------------------------|
| <b>Bewerten Sie die körperlichen Auswirkungen der Antiepileptika auf Ihren Hund.</b> | <input type="radio"/>                  | <input type="radio"/>           | <input type="radio"/> | <input type="radio"/>        | <input type="radio"/>     |
| <b>Bewerten Sie die geistigen Auswirkungen der Antiepileptika auf Ihren Hund.</b>    | <input type="radio"/>                  | <input type="radio"/>           | <input type="radio"/> | <input type="radio"/>        | <input type="radio"/>     |

Wie schwerwiegend waren die Einschränkungen, die sich aus der Pflege Ihres Hundes mit idiopathischer Epilepsie für Sie ergeben haben? \*

Bitte wählen Sie die zutreffende Antwort für jeden Punkt aus:

|                                                                                                                                 | <b>Überhaupt<br/>nicht<br/>störend</b> | <b>Geringgradig<br/>störend</b> | <b>Störend</b>        | <b>Besonders<br/>störend</b> | <b>Extrem<br/>störend</b> |
|---------------------------------------------------------------------------------------------------------------------------------|----------------------------------------|---------------------------------|-----------------------|------------------------------|---------------------------|
| <b>Bewerten Sie die<br/>Einschränkungen bei<br/>Ihrer Arbeit /<br/>Ausbildung oder Ihren<br/>täglichen Aktivitäten.</b>         | <input type="radio"/>                  | <input type="radio"/>           | <input type="radio"/> | <input type="radio"/>        | <input type="radio"/>     |
| <b>Bewerten Sie Ihre<br/>sozialen<br/>Einschränkungen.</b>                                                                      | <input type="radio"/>                  | <input type="radio"/>           | <input type="radio"/> | <input type="radio"/>        | <input type="radio"/>     |
| <b>Bewerten Sie<br/>insgesamt die<br/>Einschränkungen, die<br/>sich aus der intensiven<br/>Pflege Ihres Hundes<br/>ergeben.</b> | <input type="radio"/>                  | <input type="radio"/>           | <input type="radio"/> | <input type="radio"/>        | <input type="radio"/>     |

Vielen Dank für Ihre Teilnahme an der Umfrage! Die Ergebnisse der Studie werden Ihnen selbstverständlich mitgeteilt.

Übermittlung Ihres ausgefüllten Fragebogens:

Vielen Dank für die Beantwortung des Fragebogens.
