# Supplementary material for: A six-month prospective, randomised, double-blinded, placebo-controlled, crossover, dietary trial design to investigate the potential of psychobiotics on seizure semiology and comorbidities in canine epilepsy: study protocol
Source: PubMed Central journal article supplement (PMC9983181; doi:10.1186/s12917-023-03609-0), 2023-03-03
Supplement: 12917_2023_3609_MOESM3_ESM.pdf [file 12917_2023_3609_MOESM3_ESM.pdf]

# Epilepsie-Tagebuch

|                     |                |                           |                      |                      |
|---------------------|----------------|---------------------------|----------------------|----------------------|
| Studien-Nr.:        | TIHO-EPI-20-01 |                           |                      |                      |
| Probanden-Nr.:      |                |                           |                      |                      |
| Kontrolltermin 0:   |                |                           |                      |                      |
| 1.Tag Probiotikum:  |                |                           |                      |                      |
|                     | <b>Tag</b>     | <b>Angestrebtes Datum</b> | <b>Min (-2 Tage)</b> | <b>Max (+2 Tage)</b> |
| Telefonat 1:        | 42             |                           |                      |                      |
| Kontrolltermin 1:   | 84             |                           |                      |                      |
| Probiotikum Pause:  | 85-105         |                           |                      |                      |
| Probiotikum Beginn: | 106            |                           |                      |                      |
| Telefonat 2:        | 147            |                           |                      |                      |
| Kontrolltermin 2:   | 189            |                           |                      |                      |

## Klinik für Kleintiere

Tierärztliche Hochschule Hannover, Bünteweg 9, 30559 Hannover

Tel: +49 511 953-6200 Fax: +49 511 953-6203 Email: [Teresa.Schmidt@tiho-hannover.de](mailto:Teresa.Schmidt@tiho-hannover.de)

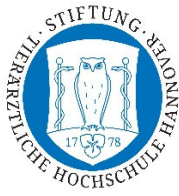

Studien-Nr.: TIHO-EPI-20-01

Teilnehmer-Nr.:

**Form 10: Epilepsie-Tagebuch**

## Hinweise zum Ausfüllen des Formulars

Alle aufgezeichneten Daten müssen Originaldaten sein.

Alle Bereiche müssen vollständig ausgefüllt oder durchgestrichen werden, falls sie nicht verwendet werden.

Alle Formulare müssen leserlich mit dokumentechter und kopierfähiger Tinte ausgefüllt werden.

Alle Formulare müssen unterschrieben und datiert werden.

Fehler dürfen nur so durchgestrichen werden, dass der Originaltext noch lesbar bleibt.

Kein Tipp-Ex® o.Ä. verwenden. Der korrigierte Eintrag muss neben den durchgestrichenen Originaleintrag geschrieben und mit Initialen, Datum und Erklärung (Fehlerkorrektur-Code) versehen werden.

Beispiele für den Fehlerkorrektur-Code finden Sie im nächsten Abschnitt.

### Fehlerkorrektur-Code\*

EF= Eingabefehler

RF= Rechtschreibfehler

RF= Rundungsfehler

FK= fehlerhafter Kommentar

ÜF= Übertragungsfehler

FC= falscher Fehlerkorrektur-Code

FP= falsche Probe

VÜ= versehentliches Überschreiben

UW= unangemessenes Wort

VE= verspäteter Eintrag

\*Bitte kreisen Sie den Fehlerkorrektur-Code ein, um ihn von den Initialen und Datum abzugrenzen.

Die Uhrzeit bitte im 24-Stunden-Format angeben (00:01-24:00).

Datum bitte in TT-MMM-JJJJ angeben (z.B. 12 NOV 2020).

Bitte immer die verwendeten Einheiten angeben. Alle Umrechnungen bitte dokumentieren.

Die ausgefüllten Formulare stellen die benötigten Rohdaten der Studie dar. Zusätzliche Beobachtungen sollen nicht in freie Spalten der Formulare eingetragen werden, sondern separat auf vorgefertigten "Notizzetteln" dokumentiert werden.

### Klinik für Kleintiere

Tierärztliche Hochschule Hannover, Bünteweg 9, 30559 Hannover

Tel: +49 511 953-6200 Fax: +49 511 953-6203 Email: [Teresa.Schmidt@tiho-hannover.de](mailto:Teresa.Schmidt@tiho-hannover.de)

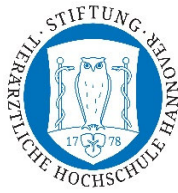

Studien-Nr.: TIHO-EPI-20-01

Teilnehmer-Nr.:

**Form 10: Epilepsie-Tagebuch**

| Tag | Datum | Anfälle ? |   | DZP?* |   | LEV?* |   |   | Anfallsanzahl | Probiotikum gegeben? | Medikamente gegeben? | Unterschrift | Kommentare |
|-----|-------|-----------|---|-------|---|-------|---|---|---------------|----------------------|----------------------|--------------|------------|
|     |       | J         | N | J     | N | J     | N | T |               |                      |                      |              |            |
| 1   |       |           |   |       |   |       |   |   |               |                      |                      |              |            |
| 2   |       |           |   |       |   |       |   |   |               |                      |                      |              |            |
| 3   |       |           |   |       |   |       |   |   |               |                      |                      |              |            |
| 4   |       |           |   |       |   |       |   |   |               |                      |                      |              |            |
| 5   |       |           |   |       |   |       |   |   |               |                      |                      |              |            |
| 6   |       |           |   |       |   |       |   |   |               |                      |                      |              |            |
| 7   |       |           |   |       |   |       |   |   |               |                      |                      |              |            |
| 8   |       |           |   |       |   |       |   |   |               |                      |                      |              |            |
| 9   |       |           |   |       |   |       |   |   |               |                      |                      |              |            |
| 10  |       |           |   |       |   |       |   |   |               |                      |                      |              |            |
| 11  |       |           |   |       |   |       |   |   |               |                      |                      |              |            |
| 12  |       |           |   |       |   |       |   |   |               |                      |                      |              |            |
| 13  |       |           |   |       |   |       |   |   |               |                      |                      |              |            |
| 14  |       |           |   |       |   |       |   |   |               |                      |                      |              |            |
| 15  |       |           |   |       |   |       |   |   |               |                      |                      |              |            |
| 16  |       |           |   |       |   |       |   |   |               |                      |                      |              |            |
| 17  |       |           |   |       |   |       |   |   |               |                      |                      |              |            |
| 18  |       |           |   |       |   |       |   |   |               |                      |                      |              |            |
| 19  |       |           |   |       |   |       |   |   |               |                      |                      |              |            |
| 20  |       |           |   |       |   |       |   |   |               |                      |                      |              |            |
| 21  |       |           |   |       |   |       |   |   |               |                      |                      |              |            |
| 22  |       |           |   |       |   |       |   |   |               |                      |                      |              |            |
| 23  |       |           |   |       |   |       |   |   |               |                      |                      |              |            |
| 24  |       |           |   |       |   |       |   |   |               |                      |                      |              |            |

\*Die Anwendung von Diazepam (DZP) kann sowohl bei einer verlängerten Anfallsaktivität (>5 Min.) als auch bei Auftreten von mehr als 3 Anfällen pro Tag angezeigt sein.

\*Mit der Levetiracetam-Impulstherapie (LEV) sollte direkt nach dem Auftreten **eines** Anfalls begonnen werden, um Serienanfälle zu vermeiden. Bitte beachten Sie das beigefügte Schema und notieren Sie wie folgt: J=ja, N=nein, T=Tag der Impulstherapie

Unterschrift des Untersuchers: \_\_\_\_\_ Datum (TTMMMJJJJ): \_\_\_\_\_

Aufgezeichnet von: \_\_\_\_\_ Datum (TTMMMJJJJ): \_\_\_\_\_

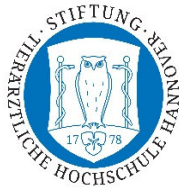

Studien-Nr.: TIHO-EPI-20-01

Teilnehmer-Nr.:

**Form 10: Epilepsie-Tagebuch**

| Tag | Datum | Anfälle ? |   | DZP?* |   | LEV?* |   |   | Anfallsanzahl | Probiotikum gegeben? | Medikamente gegeben? | Unterschrift | Kommentare |
|-----|-------|-----------|---|-------|---|-------|---|---|---------------|----------------------|----------------------|--------------|------------|
|     |       | J         | N | J     | N | J     | N | T |               |                      |                      |              |            |
| 25  |       |           |   |       |   |       |   |   |               |                      |                      |              |            |
| 26  |       |           |   |       |   |       |   |   |               |                      |                      |              |            |
| 27  |       |           |   |       |   |       |   |   |               |                      |                      |              |            |
| 28  |       |           |   |       |   |       |   |   |               |                      |                      |              |            |
| 29  |       |           |   |       |   |       |   |   |               |                      |                      |              |            |
| 30  |       |           |   |       |   |       |   |   |               |                      |                      |              |            |
| 31  |       |           |   |       |   |       |   |   |               |                      |                      |              |            |
| 32  |       |           |   |       |   |       |   |   |               |                      |                      |              |            |
| 33  |       |           |   |       |   |       |   |   |               |                      |                      |              |            |
| 34  |       |           |   |       |   |       |   |   |               |                      |                      |              |            |
| 35  |       |           |   |       |   |       |   |   |               |                      |                      |              |            |
| 36  |       |           |   |       |   |       |   |   |               |                      |                      |              |            |
| 37  |       |           |   |       |   |       |   |   |               |                      |                      |              |            |
| 38  |       |           |   |       |   |       |   |   |               |                      |                      |              |            |
| 39  |       |           |   |       |   |       |   |   |               |                      |                      |              |            |
| 40  |       |           |   |       |   |       |   |   |               |                      |                      |              |            |
| 41  |       |           |   |       |   |       |   |   |               |                      |                      |              |            |
| 42  |       |           |   |       |   |       |   |   |               |                      |                      |              |            |
| 43  |       |           |   |       |   |       |   |   |               |                      |                      |              |            |
| 44  |       |           |   |       |   |       |   |   |               |                      |                      |              |            |
| 45  |       |           |   |       |   |       |   |   |               |                      |                      |              |            |
| 46  |       |           |   |       |   |       |   |   |               |                      |                      |              |            |
| 47  |       |           |   |       |   |       |   |   |               |                      |                      |              |            |
| 48  |       |           |   |       |   |       |   |   |               |                      |                      |              |            |

\*Die Anwendung von Diazepam (DZP) kann sowohl bei einer verlängerten Anfallsaktivität (>5 Min.) als auch bei Auftreten von mehr als 3 Anfällen pro Tag angezeigt sein.

\*Mit der Levetiracetam-Impulstherapie (LEV) sollte direkt nach dem Auftreten **eines** Anfalls begonnen werden, um Serienanfälle zu vermeiden. Bitte beachten Sie das beigefügte Schema und notieren Sie wie folgt: J=ja, N=nein, T=Tag der Impulstherapie

Unterschrift des Untersuchers: \_\_\_\_\_ Datum (TTMMMJJJJ): \_\_\_\_\_

Aufgezeichnet von: \_\_\_\_\_ Datum (TTMMMJJJJ): \_\_\_\_\_

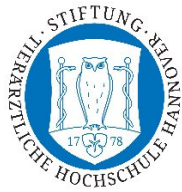

Studien-Nr.: TIHO-EPI-20-01  
 Teilnehmer-Nr.:

**Form 10: Epilepsie-Tagebuch**

| Tag | Datum | Anfälle ? |   | DZP?* |   | LEV?* |   |   | Anfallsanzahl | Probiotikum gegeben? | Medikamente gegeben? | Unterschrift | Kommentare |
|-----|-------|-----------|---|-------|---|-------|---|---|---------------|----------------------|----------------------|--------------|------------|
|     |       | J         | N | J     | N | J     | N | T |               |                      |                      |              |            |
| 49  |       |           |   |       |   |       |   |   |               |                      |                      |              |            |
| 50  |       |           |   |       |   |       |   |   |               |                      |                      |              |            |
| 51  |       |           |   |       |   |       |   |   |               |                      |                      |              |            |
| 52  |       |           |   |       |   |       |   |   |               |                      |                      |              |            |
| 53  |       |           |   |       |   |       |   |   |               |                      |                      |              |            |
| 54  |       |           |   |       |   |       |   |   |               |                      |                      |              |            |
| 55  |       |           |   |       |   |       |   |   |               |                      |                      |              |            |
| 56  |       |           |   |       |   |       |   |   |               |                      |                      |              |            |
| 57  |       |           |   |       |   |       |   |   |               |                      |                      |              |            |
| 58  |       |           |   |       |   |       |   |   |               |                      |                      |              |            |
| 59  |       |           |   |       |   |       |   |   |               |                      |                      |              |            |
| 60  |       |           |   |       |   |       |   |   |               |                      |                      |              |            |
| 61  |       |           |   |       |   |       |   |   |               |                      |                      |              |            |
| 62  |       |           |   |       |   |       |   |   |               |                      |                      |              |            |
| 63  |       |           |   |       |   |       |   |   |               |                      |                      |              |            |
| 64  |       |           |   |       |   |       |   |   |               |                      |                      |              |            |
| 65  |       |           |   |       |   |       |   |   |               |                      |                      |              |            |
| 66  |       |           |   |       |   |       |   |   |               |                      |                      |              |            |
| 67  |       |           |   |       |   |       |   |   |               |                      |                      |              |            |
| 68  |       |           |   |       |   |       |   |   |               |                      |                      |              |            |
| 69  |       |           |   |       |   |       |   |   |               |                      |                      |              |            |
| 70  |       |           |   |       |   |       |   |   |               |                      |                      |              |            |
| 71  |       |           |   |       |   |       |   |   |               |                      |                      |              |            |
| 72  |       |           |   |       |   |       |   |   |               |                      |                      |              |            |

\*Die Anwendung von Diazepam (DZP) kann sowohl bei einer verlängerten Anfallsaktivität (>5 Min.) als auch bei Auftreten von mehr als 3 Anfällen pro Tag angezeigt sein.

\*Mit der Levetiracetam-Impulstherapie (LEV) sollte direkt nach dem Auftreten **eines** Anfalls begonnen werden, um Serienanfälle zu vermeiden. Bitte beachten Sie das beigefügte Schema und notieren Sie wie folgt: J=ja, N=nein, T=Tag der Impulstherapie

Unterschrift des Untersuchers: \_\_\_\_\_ Datum (TTMMMJJJJ): \_\_\_\_\_

Aufgezeichnet von: \_\_\_\_\_ Datum (TTMMMJJJJ): \_\_\_\_\_

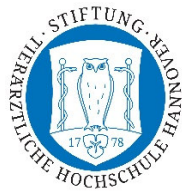

Studien-Nr.: TIHO-EPI-20-01  
 Teilnehmer-Nr.:

**Form 10: Epilepsie-Tagebuch**

| Tag | Datum | Anfälle ? |   | DZP?* |   | LEV?* |   |   | Anfallsanzahl | Probiotikum gegeben? | Medikamente gegeben? | Unterschrift | Kommentare |
|-----|-------|-----------|---|-------|---|-------|---|---|---------------|----------------------|----------------------|--------------|------------|
|     |       | J         | N | J     | N | J     | N | T |               |                      |                      |              |            |
| 73  |       |           |   |       |   |       |   |   |               |                      |                      |              |            |
| 74  |       |           |   |       |   |       |   |   |               |                      |                      |              |            |
| 75  |       |           |   |       |   |       |   |   |               |                      |                      |              |            |
| 76  |       |           |   |       |   |       |   |   |               |                      |                      |              |            |
| 77  |       |           |   |       |   |       |   |   |               |                      |                      |              |            |
| 78  |       |           |   |       |   |       |   |   |               |                      |                      |              |            |
| 79  |       |           |   |       |   |       |   |   |               |                      |                      |              |            |
| 80  |       |           |   |       |   |       |   |   |               |                      |                      |              |            |
| 81  |       |           |   |       |   |       |   |   |               |                      |                      |              |            |
| 82  |       |           |   |       |   |       |   |   |               |                      |                      |              |            |
| 83  |       |           |   |       |   |       |   |   |               |                      |                      |              |            |
| 84  |       |           |   |       |   |       |   |   |               |                      |                      |              |            |
| 85  |       |           |   |       |   |       |   |   |               |                      |                      |              |            |
| 86  |       |           |   |       |   |       |   |   |               |                      |                      |              |            |
| 87  |       |           |   |       |   |       |   |   |               |                      |                      |              |            |
| 88  |       |           |   |       |   |       |   |   |               |                      |                      |              |            |
| 89  |       |           |   |       |   |       |   |   |               |                      |                      |              |            |
| 90  |       |           |   |       |   |       |   |   |               |                      |                      |              |            |
| 91  |       |           |   |       |   |       |   |   |               |                      |                      |              |            |
| 92  |       |           |   |       |   |       |   |   |               |                      |                      |              |            |
| 93  |       |           |   |       |   |       |   |   |               |                      |                      |              |            |
| 94  |       |           |   |       |   |       |   |   |               |                      |                      |              |            |
| 95  |       |           |   |       |   |       |   |   |               |                      |                      |              |            |
| 96  |       |           |   |       |   |       |   |   |               |                      |                      |              |            |

\*Die Anwendung von Diazepam (DZP) kann sowohl bei einer verlängerten Anfallsaktivität (>5 Min.) als auch bei Auftreten von mehr als 3 Anfällen pro Tag angezeigt sein.

\*Mit der Levetiracetam-Impulstherapie (LEV) sollte direkt nach dem Auftreten eines Anfalls begonnen werden, um Serienanfälle zu vermeiden. Bitte beachten Sie das beigefügte Schema und notieren Sie wie folgt: J=ja, N=nein, T=Tag der Impulstherapie

Unterschrift des Untersuchers: \_\_\_\_\_ Datum (TTMMMJJJJ): \_\_\_\_\_

Aufgezeichnet von: \_\_\_\_\_ Datum (TTMMMJJJJ): \_\_\_\_\_

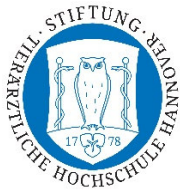

Studien-Nr.: TIHO-EPI-20-01

Teilnehmer-Nr.:

**Form 10: Epilepsie-Tagebuch**

| Tag | Datum | Anfälle ? |   | DZP?* |   | LEV?* |   |   | Anfallsanzahl | Probiotikum gegeben? | Medikamente gegeben? | Unterschrift | Kommentare |
|-----|-------|-----------|---|-------|---|-------|---|---|---------------|----------------------|----------------------|--------------|------------|
|     |       | J         | N | J     | N | J     | N | T |               |                      |                      |              |            |
| 97  |       |           |   |       |   |       |   |   |               |                      |                      |              |            |
| 98  |       |           |   |       |   |       |   |   |               |                      |                      |              |            |
| 99  |       |           |   |       |   |       |   |   |               |                      |                      |              |            |
| 100 |       |           |   |       |   |       |   |   |               |                      |                      |              |            |
| 101 |       |           |   |       |   |       |   |   |               |                      |                      |              |            |
| 102 |       |           |   |       |   |       |   |   |               |                      |                      |              |            |
| 103 |       |           |   |       |   |       |   |   |               |                      |                      |              |            |
| 104 |       |           |   |       |   |       |   |   |               |                      |                      |              |            |
| 105 |       |           |   |       |   |       |   |   |               |                      |                      |              |            |
| 106 |       |           |   |       |   |       |   |   |               |                      |                      |              |            |
| 107 |       |           |   |       |   |       |   |   |               |                      |                      |              |            |
| 108 |       |           |   |       |   |       |   |   |               |                      |                      |              |            |
| 109 |       |           |   |       |   |       |   |   |               |                      |                      |              |            |
| 110 |       |           |   |       |   |       |   |   |               |                      |                      |              |            |
| 111 |       |           |   |       |   |       |   |   |               |                      |                      |              |            |
| 112 |       |           |   |       |   |       |   |   |               |                      |                      |              |            |
| 113 |       |           |   |       |   |       |   |   |               |                      |                      |              |            |
| 114 |       |           |   |       |   |       |   |   |               |                      |                      |              |            |
| 115 |       |           |   |       |   |       |   |   |               |                      |                      |              |            |
| 116 |       |           |   |       |   |       |   |   |               |                      |                      |              |            |
| 117 |       |           |   |       |   |       |   |   |               |                      |                      |              |            |
| 118 |       |           |   |       |   |       |   |   |               |                      |                      |              |            |
| 119 |       |           |   |       |   |       |   |   |               |                      |                      |              |            |
| 120 |       |           |   |       |   |       |   |   |               |                      |                      |              |            |

\*Die Anwendung von Diazepam (DZP) kann sowohl bei einer verlängerten Anfallsaktivität (>5 Min.) als auch bei Auftreten von mehr als 3 Anfällen pro Tag angezeigt sein.

\*Mit der Levetiracetam-Impulstherapie (LEV) sollte direkt nach dem Auftreten **eines** Anfalls begonnen werden, um Serienanfälle zu vermeiden. Bitte beachten Sie das beigefügte Schema und notieren Sie wie folgt: J=ja, N=nein, T=Tag der Impulstherapie

Unterschrift des Untersuchers: \_\_\_\_\_ Datum (TTMMMJJJJ): \_\_\_\_\_

Aufgezeichnet von: \_\_\_\_\_ Datum (TTMMMJJJJ): \_\_\_\_\_

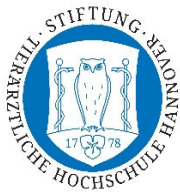

Studien-Nr.: TIHO-EPI-20-01  
 Teilnehmer-Nr.:

**Form 10: Epilepsie-Tagebuch**

| Tag | Datum | Anfälle ? |   | DZP?* |   | LEV?* |   |   | Anfallsanzahl | Probiotikum gegeben? | Medikamente gegeben? | Unterschrift | Kommentare |
|-----|-------|-----------|---|-------|---|-------|---|---|---------------|----------------------|----------------------|--------------|------------|
|     |       | J         | N | J     | N | J     | N | T |               |                      |                      |              |            |
| 121 |       |           |   |       |   |       |   |   |               |                      |                      |              |            |
| 122 |       |           |   |       |   |       |   |   |               |                      |                      |              |            |
| 123 |       |           |   |       |   |       |   |   |               |                      |                      |              |            |
| 124 |       |           |   |       |   |       |   |   |               |                      |                      |              |            |
| 125 |       |           |   |       |   |       |   |   |               |                      |                      |              |            |
| 126 |       |           |   |       |   |       |   |   |               |                      |                      |              |            |
| 127 |       |           |   |       |   |       |   |   |               |                      |                      |              |            |
| 128 |       |           |   |       |   |       |   |   |               |                      |                      |              |            |
| 129 |       |           |   |       |   |       |   |   |               |                      |                      |              |            |
| 130 |       |           |   |       |   |       |   |   |               |                      |                      |              |            |
| 131 |       |           |   |       |   |       |   |   |               |                      |                      |              |            |
| 132 |       |           |   |       |   |       |   |   |               |                      |                      |              |            |
| 133 |       |           |   |       |   |       |   |   |               |                      |                      |              |            |
| 134 |       |           |   |       |   |       |   |   |               |                      |                      |              |            |
| 135 |       |           |   |       |   |       |   |   |               |                      |                      |              |            |
| 136 |       |           |   |       |   |       |   |   |               |                      |                      |              |            |
| 137 |       |           |   |       |   |       |   |   |               |                      |                      |              |            |
| 138 |       |           |   |       |   |       |   |   |               |                      |                      |              |            |
| 139 |       |           |   |       |   |       |   |   |               |                      |                      |              |            |
| 140 |       |           |   |       |   |       |   |   |               |                      |                      |              |            |
| 141 |       |           |   |       |   |       |   |   |               |                      |                      |              |            |
| 142 |       |           |   |       |   |       |   |   |               |                      |                      |              |            |
| 143 |       |           |   |       |   |       |   |   |               |                      |                      |              |            |
| 144 |       |           |   |       |   |       |   |   |               |                      |                      |              |            |

\*Die Anwendung von Diazepam (DZP) kann sowohl bei einer verlängerten Anfallsaktivität (>5 Min.) als auch bei Auftreten von mehr als 3 Anfällen pro Tag angezeigt sein.

\*Mit der Levetiracetam-Impulstherapie (LEV) sollte direkt nach dem Auftreten **eines** Anfalls begonnen werden, um Serienanfälle zu vermeiden. Bitte beachten Sie das beigefügte Schema und notieren Sie wie folgt: J=ja, N=nein, T=Tag der Impulstherapie

Unterschrift des Untersuchers: \_\_\_\_\_ Datum (TTMMMJJJJ): \_\_\_\_\_

Aufgezeichnet von: \_\_\_\_\_ Datum (TTMMMJJJJ): \_\_\_\_\_



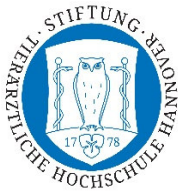

Studien-Nr.: TIHO-EPI-20-01

Teilnehmer-Nr.:

**Form 10: Epilepsie-Tagebuch**

| Tag | Datum | Anfälle ? |   | DZP?* |   | LEV?* |   |   | Anfallsanzahl | Probiotikum gegeben? | Medikamente gegeben? | Unterschrift | Kommentare |
|-----|-------|-----------|---|-------|---|-------|---|---|---------------|----------------------|----------------------|--------------|------------|
|     |       | J         | N | J     | N | J     | N | T |               |                      |                      |              |            |
| 145 |       |           |   |       |   |       |   |   |               |                      |                      |              |            |
| 146 |       |           |   |       |   |       |   |   |               |                      |                      |              |            |
| 147 |       |           |   |       |   |       |   |   |               |                      |                      |              |            |
| 148 |       |           |   |       |   |       |   |   |               |                      |                      |              |            |
| 149 |       |           |   |       |   |       |   |   |               |                      |                      |              |            |
| 150 |       |           |   |       |   |       |   |   |               |                      |                      |              |            |
| 151 |       |           |   |       |   |       |   |   |               |                      |                      |              |            |
| 152 |       |           |   |       |   |       |   |   |               |                      |                      |              |            |
| 153 |       |           |   |       |   |       |   |   |               |                      |                      |              |            |
| 154 |       |           |   |       |   |       |   |   |               |                      |                      |              |            |
| 155 |       |           |   |       |   |       |   |   |               |                      |                      |              |            |
| 156 |       |           |   |       |   |       |   |   |               |                      |                      |              |            |
| 157 |       |           |   |       |   |       |   |   |               |                      |                      |              |            |
| 158 |       |           |   |       |   |       |   |   |               |                      |                      |              |            |
| 159 |       |           |   |       |   |       |   |   |               |                      |                      |              |            |
| 160 |       |           |   |       |   |       |   |   |               |                      |                      |              |            |
| 161 |       |           |   |       |   |       |   |   |               |                      |                      |              |            |
| 162 |       |           |   |       |   |       |   |   |               |                      |                      |              |            |
| 163 |       |           |   |       |   |       |   |   |               |                      |                      |              |            |
| 164 |       |           |   |       |   |       |   |   |               |                      |                      |              |            |
| 165 |       |           |   |       |   |       |   |   |               |                      |                      |              |            |
| 166 |       |           |   |       |   |       |   |   |               |                      |                      |              |            |
| 167 |       |           |   |       |   |       |   |   |               |                      |                      |              |            |
| 168 |       |           |   |       |   |       |   |   |               |                      |                      |              |            |

\*Die Anwendung von Diazepam (DZP) kann sowohl bei einer verlängerten Anfallsaktivität (>5 Min.) als auch bei Auftreten von mehr als 3 Anfällen pro Tag angezeigt sein.

\*Mit der Levetiracetam-Impulstherapie (LEV) sollte direkt nach dem Auftreten eines Anfalls begonnen werden, um Serienanfälle zu vermeiden. Bitte beachten Sie das beigefügte Schema und notieren Sie wie folgt: J=ja, N=nein, T=Tag der Impulstherapie

Unterschrift des Untersuchers: \_\_\_\_\_ Datum (TTMMMJJJJ): \_\_\_\_\_

Aufgezeichnet von: \_\_\_\_\_ Datum (TTMMMJJJJ): \_\_\_\_\_

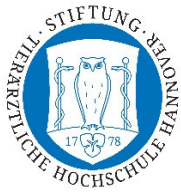

Studien-Nr.: TIHO-EPI-20-01

Teilnehmer-Nr.:

**Form 10: Epilepsie-Tagebuch**

| Tag | Datum | Anfälle ? |   | DZP?* |   | LEV?* |   |   | Anfallsanzahl | Probiotikum gegeben? | Medikamente gegeben? | Unterschrift | Kommentare |
|-----|-------|-----------|---|-------|---|-------|---|---|---------------|----------------------|----------------------|--------------|------------|
|     |       | J         | N | J     | N | J     | N | T |               |                      |                      |              |            |
| 169 |       |           |   |       |   |       |   |   |               |                      |                      |              |            |
| 170 |       |           |   |       |   |       |   |   |               |                      |                      |              |            |
| 171 |       |           |   |       |   |       |   |   |               |                      |                      |              |            |
| 172 |       |           |   |       |   |       |   |   |               |                      |                      |              |            |
| 173 |       |           |   |       |   |       |   |   |               |                      |                      |              |            |
| 174 |       |           |   |       |   |       |   |   |               |                      |                      |              |            |
| 175 |       |           |   |       |   |       |   |   |               |                      |                      |              |            |
| 176 |       |           |   |       |   |       |   |   |               |                      |                      |              |            |
| 177 |       |           |   |       |   |       |   |   |               |                      |                      |              |            |
| 178 |       |           |   |       |   |       |   |   |               |                      |                      |              |            |
| 179 |       |           |   |       |   |       |   |   |               |                      |                      |              |            |
| 180 |       |           |   |       |   |       |   |   |               |                      |                      |              |            |
| 181 |       |           |   |       |   |       |   |   |               |                      |                      |              |            |
| 182 |       |           |   |       |   |       |   |   |               |                      |                      |              |            |
| 183 |       |           |   |       |   |       |   |   |               |                      |                      |              |            |
| 184 |       |           |   |       |   |       |   |   |               |                      |                      |              |            |
| 185 |       |           |   |       |   |       |   |   |               |                      |                      |              |            |
| 186 |       |           |   |       |   |       |   |   |               |                      |                      |              |            |
| 187 |       |           |   |       |   |       |   |   |               |                      |                      |              |            |
| 188 |       |           |   |       |   |       |   |   |               |                      |                      |              |            |
| 189 |       |           |   |       |   |       |   |   |               |                      |                      |              |            |
| 190 |       |           |   |       |   |       |   |   |               |                      |                      |              |            |
| 191 |       |           |   |       |   |       |   |   |               |                      |                      |              |            |
| 192 |       |           |   |       |   |       |   |   |               |                      |                      |              |            |

\*Die Anwendung von Diazepam (DZP) kann sowohl bei einer verlängerten Anfallsaktivität (>5 Min.) als auch bei Auftreten von mehr als 3 Anfällen pro Tag angezeigt sein.

\*Mit der Levetiracetam-Impulstherapie (LEV) sollte direkt nach dem Auftreten eines Anfalls begonnen werden, um Serienanfälle zu vermeiden. Bitte beachten Sie das beigefügte Schema und notieren Sie wie folgt: J=ja, N=nein, T=Tag der Impulstherapie

Unterschrift des Untersuchers: \_\_\_\_\_ Datum (TTMMMJJJJ): \_\_\_\_\_

Aufgezeichnet von: \_\_\_\_\_ Datum (TTMMMJJJJ): \_\_\_\_\_

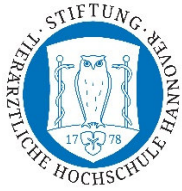

Studien-Nr.: TIHO-EPI-20-01

Teilnehmer-Nr.:

**Form 10: Epilepsie-Tagebuch**

| Tag | Datum | Anfälle ? |   | DZP?* |   | LEV?* |   |   | Anfallsanzahl | Probiotikum gegeben? | Medikamente gegeben? | Unterschrift | Kommentare |
|-----|-------|-----------|---|-------|---|-------|---|---|---------------|----------------------|----------------------|--------------|------------|
|     |       | J         | N | J     | N | J     | N | T |               |                      |                      |              |            |
| 193 |       |           |   |       |   |       |   |   |               |                      |                      |              |            |
| 194 |       |           |   |       |   |       |   |   |               |                      |                      |              |            |
| 195 |       |           |   |       |   |       |   |   |               |                      |                      |              |            |
| 196 |       |           |   |       |   |       |   |   |               |                      |                      |              |            |
| 197 |       |           |   |       |   |       |   |   |               |                      |                      |              |            |
| 198 |       |           |   |       |   |       |   |   |               |                      |                      |              |            |
| 199 |       |           |   |       |   |       |   |   |               |                      |                      |              |            |
| 200 |       |           |   |       |   |       |   |   |               |                      |                      |              |            |
| 201 |       |           |   |       |   |       |   |   |               |                      |                      |              |            |
| 202 |       |           |   |       |   |       |   |   |               |                      |                      |              |            |
| 203 |       |           |   |       |   |       |   |   |               |                      |                      |              |            |
| 204 |       |           |   |       |   |       |   |   |               |                      |                      |              |            |
| 205 |       |           |   |       |   |       |   |   |               |                      |                      |              |            |
| 206 |       |           |   |       |   |       |   |   |               |                      |                      |              |            |

\*Die Anwendung von Diazepam (DZP) kann sowohl bei einer verlängerten Anfallsaktivität (>5 Min.) als auch bei Auftreten von mehr als 3 Anfällen pro Tag angezeigt sein.

\*Mit der Levetiracetam-Impulstherapie (LEV) sollte direkt nach dem Auftreten eines Anfalls begonnen werden, um Serienanfälle zu vermeiden. Bitte beachten Sie das beigefügte Schema und notieren Sie wie folgt: J=ja, N=nein, T=Tag der Impulstherapie

Unterschrift des Untersuchers: \_\_\_\_\_ Datum (TTMMMJJJJ): \_\_\_\_\_

Aufgezeichnet von: \_\_\_\_\_ Datum (TTMMMJJJJ): \_\_\_\_\_
