# Supplementary material for: A six-month prospective, randomised, double-blinded, placebo-controlled, crossover, dietary trial design to investigate the potential of psychobiotics on seizure semiology and comorbidities in canine epilepsy: study protocol
Source: PubMed Central journal article supplement (PMC9983181; doi:10.1186/s12917-023-03609-0), 2023-03-03
Supplement: 12917_2023_3609_MOESM6_ESM.pdf [file 12917_2023_3609_MOESM6_ESM.pdf]

**Table 1 - Study Variables:** At each on-site visit, data of primary outcome (behaviour), secondary outcome (seizure semiology) as well as further data of the participants are collected (data gathered only at certain visits will be marked as: visit 0=V0, visit 1=V1, visit 2=V2). To evaluate the efficacy of the probiotic (*Bifidobacterium longum* BL999) in comparison to the placebo supplement the data will be categorised into preselected study variables and statistical analysis will be conducted as presented below. In addition, comparison groups are established from the following variables: study phase (phase 1 vs. Phase 2), study supplement (probiotic vs. placebo), responder rate (seizure frequency reduction of at least 50%) and seizure semiology (seizure type: occurrence of generalised and focal seizures; history/occurrence of cluster seizures, history/occurrence of status epilepticus). Adhered to previous studies based on a similar study design, the following table provides an overview of the planned statistical analysis [55, 56]. It is modified from Berk et al. 2019 [56].

| Variable measuring points | Visit 0                  | 1. Interim check-up | Visit 1 | 2. Interim check-up | Visit 2 |
|---------------------------|--------------------------|---------------------|---------|---------------------|---------|
| Study day                 | 0, before start of study | 42±2                | 84±2    | 147±2               | 189±2   |

| Study variable | Variable type |           | Variable type | Subtype | Statistical tests |            |
|----------------|---------------|-----------|---------------|---------|-------------------|------------|
|                | Outcome       | Covariate |               |         | Non-parametric    | Parametric |

| Demographics     |   |   |       |            |                           |               |
|------------------|---|---|-------|------------|---------------------------|---------------|
| Body weight (kg) | X |   | kg    | continuous | Wilcoxon-signed rank test | Paired t-test |
| Age (years)      |   | X | years | continuous | Wilcoxon-signed rank test | Paired t-test |

|                       |  |   |    |            |                           |               |
|-----------------------|--|---|----|------------|---------------------------|---------------|
| Body temperature (°C) |  | X | °C | continuous | Wilcoxon-signed rank test | Paired t-test |
|-----------------------|--|---|----|------------|---------------------------|---------------|

| <b>Examination</b>                                                                                                        |   |   |                                                                                   |                            |                                          |                                               |
|---------------------------------------------------------------------------------------------------------------------------|---|---|-----------------------------------------------------------------------------------|----------------------------|------------------------------------------|-----------------------------------------------|
| Clinical                                                                                                                  | X | X | abnormal/normal                                                                   | categorical                | Spearman C                               | Chi-Square X <sup>2</sup> test                |
| Neurological: mentation, behaviour, body posture, gait, cranial nerves, postural reactions, spinal reflexes, sensory exam | X | X | abnormal/normal, grading (0=absent, 1=decreased, 2=normal, 3=increased, 4=clonus) | categorical                | Spearman C                               | Chi-Square X <sup>2</sup> test                |
| Visual Analogue Scale (owner assessment of ataxia, sedation, sleep, overall quality of life)                              | X | X | 0-100, change in %                                                                | continuous/<br>categorical | Wilcoxon-signed rank test;<br>Spearman C | Paired t-test; Chi-Square X <sup>2</sup> test |

| <b>Seizure data</b> |   |  |                                        |             |                           |                                |
|---------------------|---|--|----------------------------------------|-------------|---------------------------|--------------------------------|
| Seizure frequency   | X |  | N per months, study phase, change in % | continuous  | Wilcoxon-signed rank test | Paired t-test                  |
| Seizure days        | X |  | N per months, study phase, change in % | continuous  | Wilcoxon-signed rank test | Paired t-test                  |
| Seizure types       | X |  | presence/absence                       | categorical | Spearman C                | Chi-Square X <sup>2</sup> test |

|                                 |   |  |                                                     |                        |                                                     |                                                             |
|---------------------------------|---|--|-----------------------------------------------------|------------------------|-----------------------------------------------------|-------------------------------------------------------------|
| Cluster seizure days/occurrence | X |  | N per months, positive/negative, change in %        | continuous/categorical | Wilcoxon-signed rank test; Spearman C; McNemar-test | Paired t-test; Chi-Square X <sup>2</sup> test; McNemar-test |
| Status epilepticus              | X |  | N per months, positive/negative                     | continuous/categorical | Wilcoxon-signed rank test; Spearman C; McNemar-test | Paired t-test; Chi-Square X <sup>2</sup> test; McNemar-test |
| Inter-seizure interval          | X |  | In days, months, change in %                        | continuous/categorical | Wilcoxon-signed rank test; Spearman C               | Paired t-test; Chi-Square X <sup>2</sup> test               |
| Responder rate                  | X |  | % of seizure reduction, responder vs. non-responder | continuous/categorical | Wilcoxon-signed rank test; Spearman C               | Paired t-test; Chi-Square X <sup>2</sup> test               |

| <b>Blood analysis</b>                                            |   |   |                           |            |                           |               |
|------------------------------------------------------------------|---|---|---------------------------|------------|---------------------------|---------------|
| Haematology                                                      |   | X | relative, absolute values | continuous | Wilcoxon-signed rank test | Paired t-test |
| Blood chemistry                                                  |   | X | U/l, mmol/l, µmol/l, g/l  | continuous | Wilcoxon-signed rank test | Paired t-test |
| Canine pancreatic lipase activity                                |   | X | µg/l                      | continuous | Wilcoxon-signed rank test | Paired t-test |
| Pre- and postprandial (only at V0) bile acid serum concentration | X |   | µmol/l                    | continuous | Wilcoxon-signed rank test | Paired t-test |
| Drug serum concentration                                         |   | X | µg/ml                     | continuous | Wilcoxon-signed rank test | Paired t-test |

|                       |   |  |       |            |                           |               |
|-----------------------|---|--|-------|------------|---------------------------|---------------|
| Serotonin serum level | X |  | ng/ml | continuous | Wilcoxon-signed rank test | Paired t-test |
|-----------------------|---|--|-------|------------|---------------------------|---------------|

| <b>Other physiological variables</b>                                                                                                                                               |   |  |                                                                                      |                        |                                       |                                               |
|------------------------------------------------------------------------------------------------------------------------------------------------------------------------------------|---|--|--------------------------------------------------------------------------------------|------------------------|---------------------------------------|-----------------------------------------------|
| Salvia cortisol levels                                                                                                                                                             | X |  | µg/dl                                                                                | continuous             | Wilcoxon-signed rank test             | Paired t-test                                 |
| Urinalysis (only at V0)                                                                                                                                                            | X |  | positive vs. negative; mg/dl; specific gravity                                       | continuous/categorical | Wilcoxon-signed rank test; Spearman C | Paired t-test; Chi-Square X <sup>2</sup> test |
| Neurotransmitter concentration in urine (only at V1 + V2): serotonin, histamine, glycine, phenylethylamine, dopamine, epinephrine, norepinephrine, glutamate, γ- aminobutyric acid | X |  | µmoles/g creatinine; µg/g creatinine; nmoles/g creatinine                            | continuous             | Wilcoxon-signed rank test             | Paired t-test                                 |
| Metabolome                                                                                                                                                                         | X |  | relative/absolute metabolite concentration; mmol/l; g/l                              | continuous             | Wilcoxon-signed rank test             | Paired t-test                                 |
| Microbiome (only at V1 + V2)                                                                                                                                                       | X |  | Operational Taxonomic Units (OTUs); physiological/pathological; Dysbiosis Index (DI) | continuous/categorical | Wilcoxon-signed rank test; Spearman C | Paired t-test; Chi-Square X <sup>2</sup> test |

| Questionnaire data |   |  |                                          |                            |                                                                                    |                                                                       |
|--------------------|---|--|------------------------------------------|----------------------------|------------------------------------------------------------------------------------|-----------------------------------------------------------------------|
| ADHD RS [59]       | X |  | 4 items, option-scaled rating (1-4)      | continuous/<br>categorical | N=2, Wilcoxon-<br>signed rank test;<br>N>2, Kruskal-<br>Wallis-Test;<br>Spearman C | N=2, Paired t-test;<br>N>2, ANOVA; Chi-<br>Square X <sup>2</sup> test |
| DPQ [61]           | X |  | 5 items, option-scaled rating (1-5)      | continuous/<br>categorical | N=2, Wilcoxon-<br>signed rank test;<br>N>2, Kruskal-<br>Wallis-Test;<br>Spearman C | N=2, Paired t-test;<br>N>2, ANOVA; Chi-<br>Square X <sup>2</sup> test |
| CCDR [62]          | X |  | score: 15-75, option-scaled rating (1-5) | continuous                 | N=2, Wilcoxon-<br>signed rank test;<br>N>2, Kruskal-<br>Wallis-Test;<br>Spearman C | N=2, Paired t-test;<br>N>2, ANOVA; Chi-<br>Square X <sup>2</sup> test |
| C-BARQ [63]        | X |  | 11 groups, option-scaled rating (0-4)    | continuous/<br>categorical | N=2, Wilcoxon-<br>signed rank test;<br>N>2, Kruskal-<br>Wallis-Test;<br>Spearman C | N=2, Paired t-test;<br>N>2, ANOVA; Chi-<br>Square X <sup>2</sup> test |
| EpiQoL [64]        | X |  | 5 groups, option-scaled rating (1-5/0-5) | continuous/<br>categorical | N=2, Wilcoxon-<br>signed rank test;<br>N>2, Kruskal-<br>Wallis-Test;<br>Spearman C | N=2, Paired t-test;<br>N>2, ANOVA; Chi-<br>Square X <sup>2</sup> test |

| <b>Behavioural test</b>     |   |  |                                       |                        |                                       |                                               |
|-----------------------------|---|--|---------------------------------------|------------------------|---------------------------------------|-----------------------------------------------|
| Exploratory behaviour       | X |  | distance, trait occurrence, frequency | continuous/categorical | Wilcoxon-signed rank test; Spearman C | Paired t-test; Chi-Square X <sup>2</sup> test |
| Stranger-directed behaviour | X |  | distance, trait occurrence, frequency | continuous/categorical | Wilcoxon-signed rank test; Spearman C | Paired t-test; Chi-Square X <sup>2</sup> test |
| Separation anxiety          | X |  | distance, trait occurrence, frequency | continuous/categorical | Wilcoxon-signed rank test; Spearman C | Paired t-test; Chi-Square X <sup>2</sup> test |
| Noise-related anxiety       | X |  | distance, trait occurrence, frequency | continuous/categorical | Wilcoxon-signed rank test; Spearman C | Paired t-test; Chi-Square X <sup>2</sup> test |

### List of abbreviations:

[°C: degree Celsius; N: value/amount; U: Unit; U/l: Unit per 1; %: per cent; ADHD RS: attention-deficit/hyperactivity disorder rating scale; DPQ: dog Personality Questionnaire; CCDR: canine cognitive dysfunction rating scale; C-BARQ: canine behavioural assessment & research questionnaire; EpiQoL: evaluation of quality of life in dogs with idiopathic epilepsy]

### References

55. Law TH, Davies ES, Pan Y, Zanghi B, Want E, Volk HA. A randomised trial of a medium-chain TAG diet as treatment for dogs with idiopathic epilepsy. *Br J Nutr.* 2015;114(9):1438-47.
56. Berk BA, Packer RMA, Law TH, Wessmann A, Bathen-Nothen A, Jokinen TS, et al. A double-blinded randomised dietary supplement crossover trial design to investigate the short-term influence of medium chain fatty acid (MCT) supplement on canine idiopathic epilepsy: study protocol. *BMC veterinary research.* 2019;15(1):181.
59. Vas J, Topal J, Pech E, Miklosi A. Measuring attention deficit and activity in dogs: A new application and validation of a human ADHD questionnaire. *Applied Animal Behaviour Science.* 2006;103(1-2):105-17.

61. Wright HF, Mills DS, Pollux PMJ. Development and validation of a psychometric tool for assessing impulsivity in the domestic dog (*Canis familiaris*). *International Journal of Comparative Psychology*. 2011;24(2):210-25.
62. Salvin HE, McGreevy PD, Sachdev PS, Valenzuela MJ. The canine cognitive dysfunction rating scale (CCDR): a data-driven and ecologically relevant assessment tool. *Veterinary journal*. 2011;188(3):331-6.
63. Hsu Y, Serpell JA. Development and validation of a questionnaire for measuring behavior and temperament traits in pet dogs. *J Am Vet Med Assoc*. 2003;223(9):1293-300.
64. Wessmann A, Volk HA, Parkin T, Ortega M, Anderson TJ. Evaluation of quality of life in dogs with idiopathic epilepsy. *J Vet Intern Med*. 2014;28(2):510-4.
